# Supplementary material for: Rate of brain aging and APOE ε4 are synergistic risk factors for Alzheimer’s disease
Source: Life Sci Alliance. 2019 May 27;2(3):e201900303. doi: 10.26508/lsa.201900303 (PMC6537750; doi:10.26508/lsa.201900303)
Supplement: Supplementary file 2 [file LSA-2019-00303_TableS2.xlsx]

## Sheet: TableS1.txt
Age-regulated genes
Ensembl ID	Entrez gene name	Gene Symbol	log2FoldChange	tstat	pvalue	padj
ENSG00000134986	neuronal regeneration related protein	NREP	-0.0187135	-9.87101	5.56e-23	1.16e-18
ENSG00000071205	Rho GTPase activating protein 10	ARHGAP10	-0.0205299	-9.82655	8.65e-23	1.16e-18
ENSG00000162670	BMP/retinoic acid inducible neural specific 3	BRINP3	-0.0122502	-9.49963	2.11e-21	1.89e-17
ENSG00000047936	ROS proto-oncogene 1, receptor tyrosine kinase	ROS1	0.0257433	9.33749	9.86e-21	6.62e-17
ENSG00000189238	long intergenic non-protein coding RNA 943	LINC00943	-0.0299802	-9.21462	3.12e-20	1.68e-16
ENSG00000196616	alcohol dehydrogenase 1B (class I), beta polypeptide	ADH1B	0.047413	9.19425	3.78e-20	1.69e-16
ENSG00000096060	FK506 binding protein 5	FKBP5	0.0360659	9.00619	2.13e-19	8.19e-16
ENSG00000117411	beta-1,4-galactosyltransferase 2	B4GALT2	-0.0155296	-8.73042	2.54e-18	8.52e-15
ENSG00000171189	glutamate ionotropic receptor kainate type subunit 1	GRIK1	-0.0140067	-8.67152	4.26e-18	1.27e-14
ENSG00000131080	ectodysplasin A2 receptor	EDA2R	0.0302061	8.5423	1.32e-17	3.53e-14
ENSG00000151650	VENT homeobox	VENTX	0.0553712	8.2661	1.38e-16	3.38e-13
ENSG00000237250	POTE ankyrin domain family, member F pseudogene	RP11-193H5.1	-0.0361766	-8.23313	1.82e-16	4.08e-13
ENSG00000137198	guanosine monophosphate reductase	GMPR	0.0252692	8.21157	2.18e-16	4.51e-13
ENSG00000108960	monocyte to macrophage differentiation associated	MMD	-0.0191056	-8.17777	2.89e-16	5.55e-13
ENSG00000105419	Meis homeobox 3	MEIS3	-0.0166714	-8.11385	4.9e-16	8.78e-13
ENSG00000111962	uronyl 2-sulfotransferase	UST	-0.0146682	-8.09434	5.76e-16	9.67e-13
ENSG00000081479	LDL receptor related protein 2	LRP2	0.0306773	8.04397	8.7e-16	1.37e-12
ENSG00000135824	regulator of G protein signaling 8	RGS8	-0.021133	-7.99584	1.29e-15	1.92e-12
ENSG00000087494	parathyroid hormone like hormone	PTHLH	-0.0171716	-7.97468	1.53e-15	2.16e-12
ENSG00000144057	ST6 beta-galactoside alpha-2,6-sialyltransferase 2	ST6GAL2	-0.011802	-7.95877	1.74e-15	2.33e-12
ENSG00000183729	neuropeptides B and W receptor 1	NPBWR1	-0.0326557	-7.90433	2.69e-15	3.45e-12
ENSG00000124749	collagen type XXI alpha 1 chain	COL21A1	0.0131083	7.83129	4.83e-15	5.9e-12
ENSG00000122223	CD244 molecule	CD244	-0.0292938	-7.79082	6.66e-15	7.77e-12
ENSG00000114999	tubulin tyrosine ligase	TTL	-0.00813503	-7.73359	1.05e-14	1.15e-11
ENSG00000130558	olfactomedin 1	OLFM1	-0.0164118	-7.73033	1.07e-14	1.15e-11
ENSG00000138669	protein kinase, cGMP-dependent, type II	PRKG2	-0.0149222	-7.72218	1.14e-14	1.18e-11
ENSG00000171208	neuropilin and tolloid like 2	NETO2	-0.0148465	-7.66216	1.83e-14	1.82e-11
ENSG00000044524	EPH receptor A3	EPHA3	-0.0126413	-7.51209	5.82e-14	5.58e-11
ENSG00000002587	heparan sulfate-glucosamine 3-sulfotransferase 1	HS3ST1	-0.0102964	-7.50299	6.24e-14	5.78e-11
ENSG00000160097	fibronectin type III domain containing 5	FNDC5	-0.013694	-7.43489	1.05e-13	9.37e-11
ENSG00000109255	neuromedin U	NMU	-0.032885	-7.40239	1.34e-13	1.16e-10
ENSG00000176871	WD repeat and SOCS box containing 2	WSB2	-0.0106597	-7.31943	2.49e-13	2.09e-10
ENSG00000158089	polypeptide N-acetylgalactosaminyltransferase 14	GALNT14	-0.0136039	-7.30511	2.77e-13	2.2e-10
ENSG00000229191	uncharacterized LOC101929305	RP11-168O16.1	-0.0228335	-7.30418	2.79e-13	2.2e-10
ENSG00000197261	chromosome 6 open reading frame 141	C6orf141	-0.0378979	-7.29914	2.9e-13	2.2e-10
ENSG00000147459	dedicator of cytokinesis 5	DOCK5	0.0215427	7.2933	3.02e-13	2.2e-10
ENSG00000181195	proenkephalin	PENK	-0.0269777	-7.29318	3.03e-13	2.2e-10
ENSG00000251442	long intergenic non-protein coding RNA 1094	LINC01094	0.0225366	7.28275	3.27e-13	2.31e-10
ENSG00000047457	ceruloplasmin	CP	0.0439265	7.16916	7.55e-13	5.2e-10
ENSG00000251429		RP11-597D13.7	0.027875	7.15695	8.25e-13	5.54e-10
ENSG00000185053	sarcoglycan zeta	SGCZ	-0.0132414	-7.15033	8.66e-13	5.67e-10
ENSG00000164761	TNF receptor superfamily member 11b	TNFRSF11B	0.0313775	7.13521	9.66e-13	6.18e-10
ENSG00000142530	family with sequence similarity 71 member E1	FAM71E1	-0.0181924	-7.12237	1.06e-12	6.48e-10
ENSG00000154978	vesicular, overexpressed in cancer, prosurvival protein 1	VOPP1	-0.00842834	-7.11701	1.1e-12	6.58e-10
ENSG00000160862	alpha-2-glycoprotein 1, zinc-binding	AZGP1	0.0348355	7.05245	1.76e-12	1.03e-09
ENSG00000072954	transmembrane protein 38A	TMEM38A	-0.0130056	-7.02803	2.09e-12	1.17e-09
ENSG00000177707	nectin cell adhesion molecule 3	NECTIN3	-0.0127691	-6.94099	3.89e-12	2.13e-09
ENSG00000165752	serine/threonine kinase 32C	STK32C	-0.0147549	-6.92445	4.38e-12	2.35e-09
ENSG00000175707	keratinocyte differentiation factor 1	KDF1	0.0344872	6.9119	4.78e-12	2.52e-09
ENSG00000131095	glial fibrillary acidic protein	GFAP	0.0209916	6.85373	7.19e-12	3.72e-09
ENSG00000138741	transient receptor potential cation channel subfamily C member 3	TRPC3	-0.0136124	-6.84818	7.48e-12	3.79e-09
ENSG00000137269	leucine rich repeat containing 1	LRRC1	0.0148295	6.84282	7.77e-12	3.86e-09
ENSG00000153823	phosphotyrosine interaction domain containing 1	PID1	-0.00933391	-6.83252	8.34e-12	4.07e-09
ENSG00000134853	platelet derived growth factor receptor alpha	PDGFRA	-0.0139667	-6.8249	8.8e-12	4.22e-09
ENSG00000102104	retinoschisin 1	RS1	-0.020521	-6.8034	1.02e-11	4.81e-09
ENSG00000171408	phosphodiesterase 7B	PDE7B	-0.0109619	-6.78527	1.16e-11	5.37e-09
ENSG00000186369	long intergenic non-protein coding RNA 643	LINC00643	-0.0174062	-6.74332	1.55e-11	7.05e-09
ENSG00000198797	BMP/retinoic acid inducible neural specific 2	BRINP2	-0.00855824	-6.73993	1.58e-11	7.09e-09
ENSG00000198624	coiled-coil domain containing 69	CCDC69	0.0121754	6.71758	1.85e-11	8.11e-09
ENSG00000196975	annexin A4	ANXA4	0.0105441	6.71574	1.87e-11	8.11e-09
ENSG00000167434	carbonic anhydrase 4	CA4	-0.017592	-6.70499	2.01e-11	8.59e-09
ENSG00000108100	cyclin Y	CCNY	-0.00882118	-6.70206	2.06e-11	8.62e-09
ENSG00000205929	chromosome 21 open reading frame 62	C21orf62	0.0227765	6.67098	2.54e-11	1.04e-08
ENSG00000250198	long intergenic non-protein coding RNA 2199	RP11-143A12.3	0.0233436	6.66894	2.58e-11	1.04e-08
ENSG00000048140	tetraspanin 17	TSPAN17	-0.0120441	-6.66171	2.71e-11	1.07e-08
ENSG00000114646	chondroitin sulfate proteoglycan 5	CSPG5	-0.0130504	-6.61902	3.62e-11	1.41e-08
ENSG00000110077	membrane spanning 4-domains A6A	MS4A6A	0.0333209	6.60243	4.04e-11	1.55e-08
ENSG00000154975	carbonic anhydrase 10	CA10	-0.0152823	-6.59157	4.35e-11	1.65e-08
ENSG00000235478	long intergenic non-protein coding RNA 1664	AC006946.15	-0.0179701	-6.58056	4.69e-11	1.75e-08
ENSG00000101134	docking protein 5	DOK5	-0.0107412	-6.57491	4.87e-11	1.77e-08
ENSG00000188517	collagen type XXV alpha 1 chain	COL25A1	-0.0158333	-6.57493	4.87e-11	1.77e-08
ENSG00000125378	bone morphogenetic protein 4	BMP4	0.0195248	6.56411	5.23e-11	1.87e-08
ENSG00000188133	transmembrane protein 215	TMEM215	-0.0251428	-6.55812	5.45e-11	1.93e-08
ENSG00000163520	fibulin 2	FBLN2	-0.0194428	-6.54893	5.8e-11	2.02e-08
ENSG00000163449	transmembrane protein 169	TMEM169	-0.0119869	-6.54024	6.14e-11	2.1e-08
ENSG00000174473	polypeptide N-acetylgalactosaminyltransferase like 6	GALNTL6	-0.011597	-6.53938	6.18e-11	2.1e-08
ENSG00000176463	solute carrier organic anion transporter family member 3A1	SLCO3A1	0.0129278	6.50904	7.56e-11	2.54e-08
ENSG00000091428	Rap guanine nucleotide exchange factor 4	RAPGEF4	-0.00990343	-6.48999	8.58e-11	2.85e-08
ENSG00000171303	potassium two pore domain channel subfamily K member 3	KCNK3	-0.0132352	-6.48718	8.75e-11	2.86e-08
ENSG00000107821	Kazal type serine peptidase inhibitor domain 1	KAZALD1	-0.0198278	-6.48243	9.03e-11	2.92e-08
ENSG00000231721	long intergenic non-protein coding RNA, p53 induced transcript	LINC-PINT	0.00851985	6.46705	9.99e-11	3.2e-08
ENSG00000159307	signal peptide, CUB domain and EGF like domain containing 1	SCUBE1	-0.0278987	-6.4636	1.02e-10	3.23e-08
ENSG00000248485	Purkinje cell protein 4 like 1	PCP4L1	-0.0205934	-6.4611	1.04e-10	3.25e-08
ENSG00000182631	relaxin/insulin like family peptide receptor 3	RXFP3	-0.0269299	-6.44246	1.18e-10	3.63e-08
ENSG00000172995	cAMP regulated phosphoprotein 21	ARPP21	-0.0111387	-6.43815	1.21e-10	3.69e-08
ENSG00000165828	proline rich acidic protein 1	PRAP1	-0.0414665	-6.42996	1.28e-10	3.85e-08
ENSG00000139988	retinol dehydrogenase 12 (all-trans/9-cis/11-cis)	RDH12	-0.0168822	-6.42592	1.31e-10	3.91e-08
ENSG00000203685	stum, mechanosensory transduction mediator homolog	STUM	-0.0160371	-6.42273	1.34e-10	3.95e-08
ENSG00000206579	XK related 4	XKR4	-0.0104049	-6.40885	1.47e-10	4.28e-08
ENSG00000224287	MSL complex subunit 3 pseudogene 1	MSL3P1	-0.012453	-6.40188	1.53e-10	4.4e-08
ENSG00000048545	guanylate cyclase activator 1A	GUCA1A	-0.0260263	-6.40125	1.54e-10	4.4e-08
ENSG00000263878	DLGAP1 antisense RNA 4	DLGAP1-AS4	-0.0163501	-6.39947	1.56e-10	4.41e-08
ENSG00000170340	UDP-GlcNAc:betaGal beta-1,3-N-acetylglucosaminyltransferase 2	B3GNT2	-0.0144568	-6.39744	1.58e-10	4.42e-08
ENSG00000214381	long intergenic non-protein coding RNA 488	LINC00488	-0.0307995	-6.38208	1.75e-10	4.84e-08
ENSG00000141314	rhomboid like 3	RHBDL3	0.0118789	6.37725	1.8e-10	4.94e-08
ENSG00000168081	prepronociceptin	PNOC	-0.0247481	-6.34224	2.26e-10	6.14e-08
ENSG00000172575	RAS guanyl releasing protein 1	RASGRP1	-0.0136899	-6.33277	2.41e-10	6.47e-08
ENSG00000183856	IQ motif containing GTPase activating protein 3	IQGAP3	0.02286	6.33084	2.44e-10	6.48e-08
ENSG00000152034	melanin concentrating hormone receptor 2	MCHR2	-0.0163469	-6.32093	2.6e-10	6.85e-08
ENSG00000117600	phospholipid phosphatase related 4	PLPPR4	-0.013539	-6.31872	2.64e-10	6.88e-08
ENSG00000003989	solute carrier family 7 member 2	SLC7A2	0.020418	6.31504	2.7e-10	6.98e-08
ENSG00000133627	ARP3 actin related protein 3 homolog B	ACTR3B	-0.00932514	-6.28737	3.23e-10	8.23e-08
ENSG00000078725	BMP/retinoic acid inducible neural specific 1	BRINP1	-0.00984793	-6.28638	3.25e-10	8.23e-08
ENSG00000115107	STEAP3 metalloreductase	STEAP3	0.0216415	6.28261	3.33e-10	8.36e-08
ENSG00000236700	long intergenic non-protein coding RNA 1010	LINC01010	0.0289115	6.26204	3.8e-10	9.45e-08
ENSG00000106089	syntaxin 1A	STX1A	-0.0147034	-6.25471	3.98e-10	9.81e-08
ENSG00000174521	tetratricopeptide repeat domain 9B	TTC9B	-0.0196844	-6.24664	4.19e-10	1.02e-07
ENSG00000103319	eukaryotic elongation factor 2 kinase	EEF2K	0.0095216	6.24139	4.34e-10	1.05e-07
ENSG00000104327	calbindin 1	CALB1	-0.0208614	-6.2372	4.45e-10	1.07e-07
ENSG00000153233	protein tyrosine phosphatase, receptor type R	PTPRR	-0.0109288	-6.21584	5.11e-10	1.21e-07
ENSG00000256193	long intergenic non-protein coding RNA 507	LINC00507	-0.0251232	-6.21497	5.13e-10	1.21e-07
ENSG00000102924	cerebellin 1 precursor	CBLN1	-0.0188538	-6.21372	5.17e-10	1.21e-07
ENSG00000261617	long intergenic non-protein coding RNA 2177	RP11-243A14.1	0.021161	6.21042	5.28e-10	1.22e-07
ENSG00000132434	LanC like 2	LANCL2	-0.00883065	-6.17427	6.65e-10	1.53e-07
ENSG00000095596	cytochrome P450 family 26 subfamily A member 1	CYP26A1	-0.0203114	-6.16612	7e-10	1.59e-07
ENSG00000105143	solute carrier family 1 member 6	SLC1A6	-0.0151498	-6.1628	7.15e-10	1.61e-07
ENSG00000152413	homer scaffolding protein 1	HOMER1	-0.0124428	-6.15738	7.4e-10	1.66e-07
ENSG00000248673	long intergenic non-protein coding RNA 1331	LINC01331	-0.0270587	-6.14805	7.84e-10	1.74e-07
ENSG00000057252	sterol O-acyltransferase 1	SOAT1	0.00933979	6.14375	8.06e-10	1.77e-07
ENSG00000063180	carbonic anhydrase 11	CA11	-0.0160205	-6.1407	8.22e-10	1.79e-07
ENSG00000170091	neuronal vesicle trafficking associated 2	HMP19	-0.0167719	-6.13588	8.47e-10	1.83e-07
ENSG00000154478	G protein-coupled receptor 26	GPR26	-0.0147355	-6.12893	8.85e-10	1.89e-07
ENSG00000182132	potassium voltage-gated channel interacting protein 1	KCNIP1	-0.0117487	-6.12859	8.87e-10	1.89e-07
ENSG00000128989	cAMP regulated phosphoprotein 19	ARPP19	-0.0126548	-6.12295	9.19e-10	1.94e-07
ENSG00000233123	long intergenic non-protein coding RNA 1007	LINC01007	-0.0205345	-6.09581	1.09e-09	2.28e-07
ENSG00000091490	SEL1L family member 3	SEL1L3	-0.00896235	-6.08489	1.17e-09	2.43e-07
ENSG00000175182	family with sequence similarity 131 member A	FAM131A	-0.0149625	-6.0676	1.3e-09	2.68e-07
ENSG00000090932	delta like canonical Notch ligand 3	DLL3	-0.0144796	-6.05676	1.39e-09	2.85e-07
ENSG00000079841	regulating synaptic membrane exocytosis 1	RIMS1	-0.00822507	-6.05568	1.4e-09	2.85e-07
ENSG00000123496	interleukin 13 receptor subunit alpha 2	IL13RA2	-0.020784	-6.05422	1.41e-09	2.85e-07
ENSG00000135636	dysferlin	DYSF	0.015471	6.0233	1.71e-09	3.4e-07
ENSG00000171502	collagen type XXIV alpha 1 chain	COL24A1	-0.0143067	-6.02346	1.71e-09	3.4e-07
ENSG00000165138	ankyrin repeat and sterile alpha motif domain containing 6	ANKS6	0.012739	6.00116	1.96e-09	3.87e-07
ENSG00000176641	ring finger protein 152	RNF152	-0.0100596	-5.99578	2.03e-09	3.97e-07
ENSG00000159023	erythrocyte membrane protein band 4.1	EPB41	0.00973606	5.99478	2.04e-09	3.97e-07
ENSG00000197705	kelch like family member 14	KLHL14	-0.0208068	-5.98856	2.12e-09	4.09e-07
ENSG00000131386	polypeptide N-acetylgalactosaminyltransferase 15	GALNT15	0.0159236	5.981	2.22e-09	4.25e-07
ENSG00000157617	C2 calcium dependent domain containing 2	C2CD2	0.00872351	5.97828	2.26e-09	4.3e-07
ENSG00000146469	vasoactive intestinal peptide	VIP	-0.0231458	-5.96632	2.43e-09	4.59e-07
ENSG00000143420	endosulfine alpha	ENSA	-0.01218	-5.96399	2.46e-09	4.62e-07
ENSG00000176171	BCL2 interacting protein 3	BNIP3	-0.0104279	-5.95219	2.65e-09	4.94e-07
ENSG00000171159	chromosome 9 open reading frame 16	C9orf16	-0.0135228	-5.9455	2.76e-09	5.11e-07
ENSG00000182541	LIM domain kinase 2	LIMK2	0.0156996	5.94295	2.8e-09	5.15e-07
ENSG00000188488	serpin family A member 5	SERPINA5	0.0512468	5.94173	2.82e-09	5.15e-07
ENSG00000164530	peptidase inhibitor 16	PI16	0.0191847	5.92969	3.04e-09	5.47e-07
ENSG00000160408	ST6 N-acetylgalactosaminide alpha-2,6-sialyltransferase 6	ST6GALNAC6	-0.0100458	-5.92874	3.05e-09	5.47e-07
ENSG00000163735	C-X-C motif chemokine ligand 5	CXCL5	0.0192157	5.92147	3.19e-09	5.68e-07
ENSG00000165084	chromosome 8 open reading frame 34	C8orf34	-0.0109347	-5.91892	3.24e-09	5.73e-07
ENSG00000164112	transmembrane protein 155	TMEM155	-0.0190464	-5.91624	3.29e-09	5.78e-07
ENSG00000104679	R3H domain and coiled-coil containing 1	R3HCC1	-0.00988312	-5.91194	3.38e-09	5.9e-07
ENSG00000145545	steroid 5 alpha-reductase 1	SRD5A1	-0.0101846	-5.89877	3.66e-09	6.31e-07
ENSG00000133067	leucine rich repeat containing G protein-coupled receptor 6	LGR6	-0.0336217	-5.89863	3.67e-09	6.31e-07
ENSG00000159433	StAR related lipid transfer domain containing 9	STARD9	0.0164259	5.89664	3.71e-09	6.35e-07
ENSG00000240583	aquaporin 1 (Colton blood group)	AQP1	0.0225724	5.89443	3.76e-09	6.38e-07
ENSG00000177519	reprimo, TP53 dependent G2 arrest mediator homolog	RPRM	-0.0181359	-5.89381	3.77e-09	6.38e-07
ENSG00000178602	otospiralin	OTOS	0.0277716	5.88943	3.88e-09	6.51e-07
ENSG00000012223	lactotransferrin	LTF	0.0451017	5.88725	3.93e-09	6.55e-07
ENSG00000134072	calcium/calmodulin dependent protein kinase I	CAMK1	-0.0139798	-5.88229	4.05e-09	6.71e-07
ENSG00000259523		RP11-680F8.3	0.0173341	5.87985	4.11e-09	6.77e-07
ENSG00000168405	cytidine monophospho-N-acetylneuraminic acid hydroxylase, pseudogene	CMAHP	0.0143244	5.87765	4.16e-09	6.81e-07
ENSG00000128285	melanin concentrating hormone receptor 1	MCHR1	-0.0180215	-5.8717	4.31e-09	7.02e-07
ENSG00000166111	SV2 related protein	SVOP	-0.0169318	-5.87072	4.34e-09	7.02e-07
ENSG00000138653	N-deacetylase and N-sulfotransferase 4	NDST4	-0.0139375	-5.86294	4.55e-09	7.31e-07
ENSG00000205436	exocyst complex component 3 like 4	EXOC3L4	-0.0540265	-5.85589	4.74e-09	7.59e-07
ENSG00000101958	glycine receptor alpha 2	GLRA2	-0.0148247	-5.85056	4.9e-09	7.79e-07
ENSG00000109906	zinc finger and BTB domain containing 16	ZBTB16	0.0125091	5.84743	4.99e-09	7.89e-07
ENSG00000266573		RP11-449D8.5	-0.0260675	-5.83991	5.22e-09	8.2e-07
ENSG00000115526	carbohydrate sulfotransferase 10	CHST10	-0.00864134	-5.82671	5.65e-09	8.81e-07
ENSG00000110723	exophilin 5	EXPH5	-0.0114248	-5.82605	5.68e-09	8.81e-07
ENSG00000109794	family with sequence similarity 149 member A	FAM149A	-0.00983174	-5.82114	5.84e-09	8.99e-07
ENSG00000120729	myotilin	MYOT	0.0168311	5.82069	5.86e-09	8.99e-07
ENSG00000087116	ADAM metallopeptidase with thrombospondin type 1 motif 2	ADAMTS2	0.0202801	5.81731	5.98e-09	9.07e-07
ENSG00000053702	nuclear receptor interacting protein 2	NRIP2	0.0128563	5.81014	6.24e-09	9.42e-07
ENSG00000175352	nuclear receptor interacting protein 3	NRIP3	-0.0141132	-5.80573	6.41e-09	9.62e-07
ENSG00000141469	solute carrier family 14 member 1 (Kidd blood group)	SLC14A1	0.0256184	5.79723	6.74e-09	1e-06
ENSG00000117650	NIMA related kinase 2	NEK2	-0.0312624	-5.79714	6.75e-09	1e-06
ENSG00000151952	transmembrane protein 132D	TMEM132D	-0.00864505	-5.78818	7.12e-09	1.05e-06
ENSG00000168734	cAMP-dependent protein kinase inhibitor gamma	PKIG	-0.0125149	-5.78296	7.34e-09	1.08e-06
ENSG00000154864	piezo type mechanosensitive ion channel component 2	PIEZO2	0.0177965	5.78092	7.43e-09	1.08e-06
ENSG00000105173	cyclin E1	CCNE1	-0.0108834	-5.77754	7.58e-09	1.1e-06
ENSG00000167995	bestrophin 1	BEST1	0.0165056	5.77143	7.86e-09	1.14e-06
ENSG00000164466	sideroflexin 1	SFXN1	-0.00813156	-5.76338	8.24e-09	1.18e-06
ENSG00000258227	C-type lectin domain containing 5A	CLEC5A	0.0395827	5.76296	8.27e-09	1.18e-06
ENSG00000130520	LSM4 homolog, U6 small nuclear RNA and mRNA degradation associated	LSM4	-0.0120408	-5.76033	8.4e-09	1.19e-06
ENSG00000197006	methyltransferase like 9	METTL9	-0.00881261	-5.75132	8.85e-09	1.25e-06
ENSG00000145708	corticotropin releasing hormone binding protein	CRHBP	-0.0192601	-5.74945	8.95e-09	1.26e-06
ENSG00000254999	BRICK1, SCAR/WAVE actin nucleating complex subunit	BRK1	-0.0113985	-5.74788	9.04e-09	1.26e-06
ENSG00000225968	extracellular leucine rich repeat and fibronectin type III domain containing 1	ELFN1	-0.0155093	-5.7396	9.49e-09	1.32e-06
ENSG00000134324	lipin 1	LPIN1	0.00694237	5.737	9.64e-09	1.33e-06
ENSG00000132470	integrin subunit beta 4	ITGB4	0.0219587	5.73267	9.89e-09	1.36e-06
ENSG00000225217	heat shock protein family A (Hsp70) member 7	HSPA7	0.0482396	5.72974	1.01e-08	1.38e-06
ENSG00000163930	BRCA1 associated protein 1	BAP1	-0.0078664	-5.72009	1.06e-08	1.45e-06
ENSG00000235026	DPP10 antisense RNA 1	DPP10-AS1	-0.0148618	-5.71762	1.08e-08	1.47e-06
ENSG00000128641	myosin IB	MYO1B	-0.0102814	-5.71623	1.09e-08	1.47e-06
ENSG00000189159	Jupiter microtubule associated homolog 1	HN1	-0.0132875	-5.71412	1.1e-08	1.48e-06
ENSG00000161912	adenylate cyclase 10, soluble pseudogene 1	ADCY10P1	0.016445	5.71108	1.12e-08	1.5e-06
ENSG00000182253	synemin	SYNM	0.0075024	5.70383	1.17e-08	1.56e-06
ENSG00000166147	fibrillin 1	FBN1	0.00748687	5.7017	1.19e-08	1.57e-06
ENSG00000183662	family with sequence similarity 19 member A1, C-C motif chemokine like	FAM19A1	-0.0149775	-5.70078	1.19e-08	1.57e-06
ENSG00000165959	calmin	CLMN	0.0166423	5.69921	1.2e-08	1.58e-06
ENSG00000225937	prostate cancer associated 3 (non-protein coding)	PCA3	0.0259627	5.69457	1.24e-08	1.61e-06
ENSG00000148123	phospholipid phosphatase related 1	PLPPR1	-0.0144602	-5.69278	1.25e-08	1.62e-06
ENSG00000154764	Wnt family member 7A	WNT7A	-0.0130522	-5.69185	1.26e-08	1.62e-06
ENSG00000147571	corticotropin releasing hormone	CRH	-0.0295677	-5.69022	1.27e-08	1.63e-06
ENSG00000177675	CD163 molecule like 1	CD163L1	-0.0147477	-5.684	1.32e-08	1.68e-06
ENSG00000101222	sperm flagellar 1	SPEF1	-0.0178415	-5.68129	1.34e-08	1.7e-06
ENSG00000249484	long intergenic non-protein coding RNA 1470	LINC01470	0.0284179	5.67528	1.38e-08	1.75e-06
ENSG00000005108	thrombospondin type 1 domain containing 7A	THSD7A	-0.0088673	-5.66707	1.45e-08	1.83e-06
ENSG00000226380	long intergenic non-protein coding RNA, p53 induced transcript	MIR29A	0.0185213	5.66349	1.48e-08	1.86e-06
ENSG00000030066	nucleoporin 160	NUP160	0.00651458	5.66294	1.49e-08	1.86e-06
ENSG00000140798	ATP binding cassette subfamily C member 12	ABCC12	-0.0160812	-5.65061	1.6e-08	1.99e-06
ENSG00000161405	IKAROS family zinc finger 3	IKZF3	0.0281638	5.6471	1.63e-08	2.02e-06
ENSG00000179456	zinc finger and BTB domain containing 18	ZBTB18	-0.00927466	-5.64611	1.64e-08	2.02e-06
ENSG00000166348	ubiquitin specific peptidase 54	USP54	0.0104545	5.64179	1.68e-08	2.06e-06
ENSG00000198822	glutamate metabotropic receptor 3	GRM3	-0.00840374	-5.63197	1.78e-08	2.18e-06
ENSG00000115616	solute carrier family 9 member A2	SLC9A2	-0.0125212	-5.62608	1.84e-08	2.24e-06
ENSG00000151789	zinc finger protein 385D	ZNF385D	-0.0110939	-5.62343	1.87e-08	2.24e-06
ENSG00000182732	regulator of G protein signaling 6	RGS6	-0.00829285	-5.62408	1.87e-08	2.24e-06
ENSG00000177575	CD163 molecule	CD163	0.0384542	5.62196	1.89e-08	2.25e-06
ENSG00000188596	cilia and flagella associated protein 54	CFAP54	0.0107569	5.61874	1.92e-08	2.28e-06
ENSG00000230051		CTA-929C8.8	-0.027932	-5.61942	1.92e-08	2.28e-06
ENSG00000242173	Rho GDP dissociation inhibitor gamma	ARHGDIG	-0.0158364	-5.61166	2e-08	2.36e-06
ENSG00000214357	neuralized E3 ubiquitin protein ligase 1B	NEURL1B	-0.0103151	-5.60159	2.12e-08	2.48e-06
ENSG00000176928	glucosaminyl (N-acetyl) transferase 4, core 2	GCNT4	-0.0128352	-5.60128	2.13e-08	2.48e-06
ENSG00000138193	phospholipase C epsilon 1	PLCE1	0.0117779	5.58679	2.31e-08	2.68e-06
ENSG00000162975	potassium voltage-gated channel modifier subfamily F member 1	KCNF1	-0.0136492	-5.58559	2.33e-08	2.68e-06
ENSG00000121766	zinc finger CCHC-type containing 17	ZCCHC17	-0.0115835	-5.57969	2.41e-08	2.77e-06
ENSG00000205403	complement factor I	CFI	0.0229469	5.57488	2.48e-08	2.83e-06
ENSG00000076382	sperm associated antigen 5	SPAG5	0.00877296	5.57118	2.53e-08	2.88e-06
ENSG00000256196		RP11-881M11.4	-0.0155223	-5.56821	2.57e-08	2.91e-06
ENSG00000185052	solute carrier family 24 member 3	SLC24A3	-0.0101171	-5.56774	2.58e-08	2.91e-06
ENSG00000197991	protocadherin 20	RP11-310K10.1	-0.0137019	-5.56159	2.67e-08	2.99e-06
ENSG00000155760	frizzled class receptor 7	FZD7	0.0135467	5.56077	2.69e-08	2.99e-06
ENSG00000233559	long intergenic non-protein coding RNA 513	AC016831.7	0.0231384	5.55461	2.78e-08	3.09e-06
ENSG00000254664		CTD-2560E9.3	-0.0325544	-5.54994	2.86e-08	3.16e-06
ENSG00000135473	PAN2 poly(A) specific ribonuclease subunit	PAN2	0.00834547	5.54862	2.88e-08	3.17e-06
ENSG00000053747	laminin subunit alpha 3	LAMA3	0.0108507	5.53164	3.17e-08	3.48e-06
ENSG00000206052	docking protein 6	DOK6	-0.0124736	-5.52803	3.24e-08	3.54e-06
ENSG00000138028	cell growth regulator with EF-hand domain 1	CGREF1	-0.011224	-5.52285	3.34e-08	3.63e-06
ENSG00000086717	protein phosphatase with EF-hand domain 1	PPEF1	-0.0202742	-5.51504	3.49e-08	3.76e-06
ENSG00000072182	acid sensing ion channel subunit family member 4	ASIC4	-0.0109651	-5.51327	3.52e-08	3.77e-06
ENSG00000107833	nucleophosmin/nucleoplasmin 3	NPM3	-0.0167161	-5.5134	3.52e-08	3.77e-06
ENSG00000163873	glutamate ionotropic receptor kainate type subunit 3	GRIK3	-0.00886248	-5.51265	3.53e-08	3.77e-06
ENSG00000101473	acyl-CoA thioesterase 8	ACOT8	-0.00922417	-5.51101	3.57e-08	3.79e-06
ENSG00000158882	translocase of outer mitochondrial membrane 40 like	TOMM40L	-0.00833452	-5.5085	3.62e-08	3.83e-06
ENSG00000163071	spermatogenesis associated 18	SPATA18	0.0134471	5.50771	3.64e-08	3.83e-06
ENSG00000143772	inositol-trisphosphate 3-kinase B	ITPKB	0.0139164	5.50529	3.69e-08	3.85e-06
ENSG00000105989	Wnt family member 2	WNT2	-0.0166824	-5.50529	3.69e-08	3.85e-06
ENSG00000171314	phosphoglycerate mutase 1	PGAM1	-0.0107894	-5.50083	3.78e-08	3.94e-06
ENSG00000182636	necdin, MAGE family member	NDN	-0.0118563	-5.49514	3.9e-08	4.05e-06
ENSG00000144227	neurexophilin 2	NXPH2	-0.0200586	-5.48289	4.18e-08	4.32e-06
ENSG00000259831	long intergenic non-protein coding RNA 567	LINC00567	-0.019793	-5.48111	4.23e-08	4.35e-06
ENSG00000176046	nuclear protein 1, transcriptional regulator	NUPR1	0.0242526	5.47878	4.28e-08	4.37e-06
ENSG00000143774	guanylate kinase 1	GUK1	-0.0110677	-5.47885	4.28e-08	4.37e-06
ENSG00000178234	polypeptide N-acetylgalactosaminyltransferase 11	GALNT11	-0.0101531	-5.47558	4.36e-08	4.44e-06
ENSG00000116983	hippocalcin like 4	HPCAL4	-0.00966774	-5.47158	4.46e-08	4.52e-06
ENSG00000132911	neuromedin U receptor 2	NMUR2	0.0303183	5.47041	4.49e-08	4.53e-06
ENSG00000198729	protein phosphatase 1 regulatory inhibitor subunit 14C	PPP1R14C	-0.0145339	-5.46716	4.57e-08	4.6e-06
ENSG00000179593	arachidonate 15-lipoxygenase, type B	ALOX15B	0.0321596	5.46386	4.66e-08	4.66e-06
ENSG00000183935	5-hydroxytryptamine receptor 7 pseudogene 1	HTR7P1	-0.0105389	-5.46358	4.67e-08	4.66e-06
ENSG00000131242	RAB11 family interacting protein 4	RAB11FIP4	-0.0070378	-5.44719	5.12e-08	5.07e-06
ENSG00000134917	ADAM metallopeptidase with thrombospondin type 1 motif 8	ADAMTS8	-0.0113748	-5.44198	5.27e-08	5.2e-06
ENSG00000214087	ADP ribosylation factor like GTPase 16	ARL16	-0.0100382	-5.43951	5.34e-08	5.26e-06
ENSG00000155011	dickkopf WNT signaling pathway inhibitor 2	DKK2	-0.0151881	-5.43231	5.56e-08	5.45e-06
ENSG00000162782	tudor domain containing 5	TDRD5	-0.018196	-5.43098	5.6e-08	5.47e-06
ENSG00000067840	PDZ domain containing 4	PDZD4	-0.0108286	-5.42527	5.79e-08	5.63e-06
ENSG00000197057	death domain containing 1	DTHD1	0.0251887	5.42331	5.85e-08	5.67e-06
ENSG00000174032	solute carrier family 25 member 30	SLC25A30	0.00708961	5.41827	6.02e-08	5.81e-06
ENSG00000100897	DDB1 and CUL4 associated factor 11	DCAF11	-0.00760815	-5.41528	6.12e-08	5.89e-06
ENSG00000257501	platelet activating factor acetylhydrolase 1b catalytic subunit 2 pseudogene	RP11-1016B18.1	-0.0157222	-5.41424	6.15e-08	5.9e-06
ENSG00000118113	matrix metallopeptidase 8	MMP8	0.0789164	5.4114	6.25e-08	5.97e-06
ENSG00000132964	cyclin dependent kinase 8	CDK8	-0.0064189	-5.41086	6.27e-08	5.97e-06
ENSG00000016602	chloride channel accessory 4	CLCA4	0.0197501	5.4096	6.32e-08	6e-06
ENSG00000128203	aspartate beta-hydroxylase domain containing 2	ASPHD2	-0.00857721	-5.39376	6.9e-08	6.53e-06
ENSG00000188729	osteocrin	OSTN	-0.0226409	-5.39218	6.96e-08	6.56e-06
ENSG00000242258	long intergenic non-protein coding RNA 996	LINC00996	-0.0426014	-5.38925	7.08e-08	6.63e-06
ENSG00000211448	iodothyronine deiodinase 2	DIO2	-0.016914	-5.38881	7.09e-08	6.63e-06
ENSG00000162545	calcium/calmodulin dependent protein kinase II inhibitor 1	CAMK2N1	-0.00910612	-5.38842	7.11e-08	6.63e-06
ENSG00000112038	opioid receptor mu 1	OPRM1	0.0142152	5.38139	7.39e-08	6.87e-06
ENSG00000198873	G protein-coupled receptor kinase 5	GRK5	-0.0088352	-5.37753	7.55e-08	6.99e-06
ENSG00000134757	desmoglein 3	DSG3	-0.0170755	-5.37612	7.61e-08	7.02e-06
ENSG00000165023	DIRAS family GTPase 2	DIRAS2	-0.0132092	-5.36785	7.97e-08	7.33e-06
ENSG00000183943	protein kinase, X-linked	PRKX	0.0132569	5.36628	8.04e-08	7.35e-06
ENSG00000149600	COMM domain containing 7	COMMD7	-0.00790016	-5.36623	8.04e-08	7.35e-06
ENSG00000100242	Sad1 and UNC84 domain containing 2	SUN2	0.0108592	5.36538	8.08e-08	7.35e-06
ENSG00000153347	family with sequence similarity 81 member B	FAM81B	0.0271317	5.36477	8.11e-08	7.35e-06
ENSG00000100181	transmembrane phosphatase with tensin homology pseudogene 1	TPTEP1	0.0172128	5.36193	8.23e-08	7.45e-06
ENSG00000171130	ATPase H+ transporting V0 subunit e2	ATP6V0E2	-0.0100278	-5.36008	8.32e-08	7.5e-06
ENSG00000121764	hypocretin receptor 1	HCRTR1	-0.0287809	-5.35872	8.38e-08	7.53e-06
ENSG00000103942	homer scaffolding protein 2	HOMER2	-0.00575581	-5.3574	8.44e-08	7.55e-06
ENSG00000175906	ADP ribosylation factor like GTPase 4D	ARL4D	-0.0164541	-5.35708	8.46e-08	7.55e-06
ENSG00000249436		CTD-2023N9.3	-0.021943	-5.35538	8.54e-08	7.59e-06
ENSG00000118515	serum/glucocorticoid regulated kinase 1	SGK1	0.014545	5.35358	8.62e-08	7.64e-06
ENSG00000082482	potassium two pore domain channel subfamily K member 2	KCNK2	-0.00925151	-5.34798	8.89e-08	7.83e-06
ENSG00000162642	chromosome 1 open reading frame 52	C1orf52	-0.0102078	-5.34802	8.89e-08	7.83e-06
ENSG00000175206	natriuretic peptide A	NPPA	-0.0214711	-5.34727	8.93e-08	7.84e-06
ENSG00000196136	serpin family A member 3	SERPINA3	0.0487696	5.34528	9.03e-08	7.89e-06
ENSG00000160224	autoimmune regulator	AIRE	0.0229458	5.3449	9.05e-08	7.89e-06
ENSG00000146197	signal peptide, CUB domain and EGF like domain containing 3	SCUBE3	0.0137543	5.34343	9.12e-08	7.93e-06
ENSG00000136261	basic leucine zipper and W2 domains 2	BZW2	-0.00939537	-5.34265	9.16e-08	7.94e-06
ENSG00000124205	endothelin 3	EDN3	-0.0165137	-5.34122	9.23e-08	7.97e-06
ENSG00000238105	golgin A2 pseudogene 5	GOLGA2P5	0.0144638	5.33679	9.46e-08	8.12e-06
ENSG00000174482	leucine rich repeat and Ig domain containing 2	LINGO2	-0.0103692	-5.33686	9.46e-08	8.12e-06
ENSG00000259846		RP11-467L24.1	-0.0329369	-5.336	9.5e-08	8.13e-06
ENSG00000237166	long intergenic non-protein coding RNA 1792	AC007163.3	0.020441	5.33529	9.54e-08	8.13e-06
ENSG00000120158	RNA terminal phosphate cyclase like 1	RCL1	0.00687644	5.33353	9.63e-08	8.19e-06
ENSG00000176438	spectrin repeat containing nuclear envelope family member 3	SYNE3	0.0135422	5.33248	9.69e-08	8.21e-06
ENSG00000244301		AOX3P	0.0288631	5.32914	9.87e-08	8.33e-06
ENSG00000049283	epsin 3	EPN3	0.0190712	5.32074	1.03e-07	8.7e-06
ENSG00000067606	protein kinase C zeta	PRKCZ	-0.0118798	-5.31946	1.04e-07	8.74e-06
ENSG00000188690	uroporphyrinogen III synthase	UROS	-0.0115342	-5.31829	1.05e-07	8.76e-06
ENSG00000081248	calcium voltage-gated channel subunit alpha1 S	CACNA1S	-0.0178848	-5.31604	1.06e-07	8.82e-06
ENSG00000251450	RASGRF2 antisense RNA 1	RASGRF2-AS1	-0.0180056	-5.3162	1.06e-07	8.82e-06
ENSG00000255087	uncharacterized LOC101929473	RP11-168K9.2	-0.017748	-5.30472	1.13e-07	9.35e-06
ENSG00000170291	elongator acetyltransferase complex subunit 5	ELP5	-0.0069635	-5.3028	1.14e-07	9.42e-06
ENSG00000100276	RAS like family 10 member A	RASL10A	-0.0171035	-5.30191	1.15e-07	9.44e-06
ENSG00000158683	polycystin 1 like 1, transient receptor potential channel interacting	PKD1L1	0.0148381	5.3	1.16e-07	9.51e-06
ENSG00000136026	cytoskeleton associated protein 4	CKAP4	-0.00668944	-5.29644	1.18e-07	9.64e-06
ENSG00000163444	transmembrane protein 183A	TMEM183A	-0.0128292	-5.29694	1.18e-07	9.64e-06
ENSG00000152137	heat shock protein family B (small) member 8	HSPB8	0.00917421	5.29417	1.2e-07	9.73e-06
ENSG00000173947	primary cilia formation	PIFO	0.0133426	5.2891	1.23e-07	9.97e-06
ENSG00000157005	somatostatin	SST	-0.0270918	-5.28479	1.26e-07	1.02e-05
ENSG00000152495	calcium/calmodulin dependent protein kinase IV	CAMK4	-0.0147903	-5.28243	1.27e-07	1.03e-05
ENSG00000119969	helicase, lymphoid specific	HELLS	0.0107777	5.28213	1.28e-07	1.03e-05
ENSG00000249307	long intergenic non-protein coding RNA 1088	LINC01088	0.0254647	5.28185	1.28e-07	1.03e-05
ENSG00000257176	uncharacterized LOC100506606	RP11-996F15.2	0.0121502	5.28097	1.29e-07	1.03e-05
ENSG00000134115	contactin 6	CNTN6	-0.0148986	-5.2805	1.29e-07	1.03e-05
ENSG00000172986	glucoside xylosyltransferase 2	GXYLT2	0.00877137	5.27161	1.35e-07	1.07e-05
ENSG00000213626	limb bud and heart development	LBH	-0.0170362	-5.27258	1.35e-07	1.07e-05
ENSG00000167588	glycerol-3-phosphate dehydrogenase 1	GPD1	-0.0171847	-5.26573	1.4e-07	1.1e-05
ENSG00000179774	atonal bHLH transcription factor 7	ATOH7	-0.0159364	-5.25842	1.45e-07	1.14e-05
ENSG00000156076	WNT inhibitory factor 1	WIF1	-0.0204786	-5.25574	1.47e-07	1.15e-05
ENSG00000123064	DEAD-box helicase 54	DDX54	-0.00863963	-5.25582	1.47e-07	1.15e-05
ENSG00000106367	adaptor related protein complex 1 sigma 1 subunit	AP1S1	-0.0167271	-5.25663	1.47e-07	1.15e-05
ENSG00000119638	NIMA related kinase 9	NEK9	0.00690433	5.25169	1.51e-07	1.17e-05
ENSG00000138434	sperm specific antigen 2	SSFA2	0.00795722	5.2483	1.54e-07	1.19e-05
ENSG00000124702	kelch domain containing 3	KLHDC3	-0.0146959	-5.24489	1.56e-07	1.21e-05
ENSG00000172426	radial spoke head 9 homolog	RSPH9	-0.0107948	-5.24123	1.6e-07	1.23e-05
ENSG00000183833	MYCBP associated and testis expressed 1	MAATS1	0.00896777	5.23801	1.62e-07	1.25e-05
ENSG00000198740	zinc finger protein 652	ZNF652	0.00978699	5.23694	1.63e-07	1.25e-05
ENSG00000162598	chromosome 1 open reading frame 87	C1orf87	0.0369759	5.21904	1.8e-07	1.38e-05
ENSG00000079393	dual specificity phosphatase 13	DUSP13	-0.0418401	-5.21691	1.82e-07	1.39e-05
ENSG00000234056	long intergenic non-protein coding RNA 463	LINC00463	0.0287771	5.21034	1.88e-07	1.43e-05
ENSG00000137267	tubulin beta 2A class IIa	TUBB2A	-0.0144256	-5.20799	1.91e-07	1.45e-05
ENSG00000105058	family with sequence similarity 32 member A	FAM32A	-0.0096707	-5.2058	1.93e-07	1.46e-05
ENSG00000153563	CD8a molecule	CD8A	-0.0106816	-5.20471	1.94e-07	1.47e-05
ENSG00000121905	hippocalcin	HPCA	-0.0131255	-5.19727	2.02e-07	1.51e-05
ENSG00000108309	RUN domain containing 3A	RUNDC3A	-0.00970126	-5.19731	2.02e-07	1.51e-05
ENSG00000182667	neurotrimin	NTM	-0.0053332	-5.19736	2.02e-07	1.51e-05
ENSG00000002330	BCL2 associated agonist of cell death	BAD	-0.0113464	-5.19747	2.02e-07	1.51e-05
ENSG00000112851	erbb2 interacting protein	ERBIN	0.0120382	5.19578	2.04e-07	1.51e-05
ENSG00000185666	synapsin III	SYN3	0.0139736	5.19557	2.04e-07	1.51e-05
ENSG00000030419	IKAROS family zinc finger 2	IKZF2	0.0127108	5.1955	2.04e-07	1.51e-05
ENSG00000119698	protein phosphatase 4 regulatory subunit 4	PPP4R4	-0.0109776	-5.19106	2.09e-07	1.54e-05
ENSG00000267673	ferredoxin 1 like	FDX2	-0.0129628	-5.18754	2.13e-07	1.57e-05
ENSG00000156603	mediator complex subunit 19	MED19	-0.0100758	-5.18673	2.14e-07	1.57e-05
ENSG00000145632	polo like kinase 2	PLK2	-0.0125228	-5.18018	2.22e-07	1.62e-05
ENSG00000152936	lamin tail domain containing 1	LMNTD1	0.0186138	5.17763	2.25e-07	1.64e-05
ENSG00000006625	gamma-glutamylcyclotransferase	GGCT	-0.0128171	-5.17574	2.27e-07	1.65e-05
ENSG00000127423	aurora kinase A and ninein interacting protein	AUNIP	-0.0108059	-5.16846	2.36e-07	1.71e-05
ENSG00000102096	Pim-2 proto-oncogene, serine/threonine kinase	PIM2	-0.00918581	-5.16786	2.37e-07	1.71e-05
ENSG00000146223	ribosomal protein L7 like 1	RPL7L1	-0.00671984	-5.16611	2.39e-07	1.72e-05
ENSG00000204764	RAN binding protein 17	RANBP17	-0.010691	-5.1611	2.45e-07	1.76e-05
ENSG00000198785	glutamate ionotropic receptor NMDA type subunit 3A	GRIN3A	-0.010013	-5.15708	2.51e-07	1.8e-05
ENSG00000058866	diacylglycerol kinase gamma	DGKG	0.00753159	5.15657	2.52e-07	1.8e-05
ENSG00000225140	uncharacterized LOC101930421	RP11-809C18.3	0.0147063	5.15097	2.59e-07	1.84e-05
ENSG00000197358	BCL2 interacting protein 3 pseudogene 1	BNIP3P1	-0.015377	-5.15131	2.59e-07	1.84e-05
ENSG00000248455	long intergenic non-protein coding RNA 2217	RP11-321E2.3	-0.0200927	-5.14746	2.64e-07	1.87e-05
ENSG00000233936		RP11-399H11.2	-0.0194082	-5.14092	2.73e-07	1.93e-05
ENSG00000236850		BMS1P20	-0.00865986	-5.13798	2.78e-07	1.96e-05
ENSG00000141698	5'-nucleotidase, cytosolic IIIB	NT5C3B	-0.0104596	-5.13485	2.82e-07	1.99e-05
ENSG00000178947	small integral membrane protein 10 like 2A	SMIM10L2A	-0.0119421	-5.1275	2.94e-07	2.06e-05
ENSG00000154723	ATP synthase, H+ transporting, mitochondrial Fo complex subunit F6	ATP5J	-0.0103877	-5.12693	2.95e-07	2.06e-05
ENSG00000172531	protein phosphatase 1 catalytic subunit alpha	PPP1CA	-0.00921899	-5.12391	2.99e-07	2.09e-05
ENSG00000000971	complement factor H	CFH	0.0187345	5.12243	3.02e-07	2.1e-05
ENSG00000006128	tachykinin precursor 1	TAC1	-0.0232449	-5.12097	3.04e-07	2.11e-05
ENSG00000179841	A-kinase anchoring protein 5	AKAP5	-0.0122735	-5.12059	3.05e-07	2.11e-05
ENSG00000109061	myosin heavy chain 1	MYH1	0.0347012	5.11886	3.07e-07	2.12e-05
ENSG00000102575	acid phosphatase 5, tartrate resistant	ACP5	0.0216148	5.11508	3.14e-07	2.16e-05
ENSG00000172493	AF4/FMR2 family member 1	AFF1	0.00938804	5.11456	3.14e-07	2.16e-05
ENSG00000156535	CD109 molecule	CD109	0.013206	5.11005	3.22e-07	2.2e-05
ENSG00000157796	WD repeat domain 19	WDR19	0.00582999	5.11002	3.22e-07	2.2e-05
ENSG00000175267	von Willebrand factor A domain containing 3A	VWA3A	0.0153869	5.10932	3.23e-07	2.2e-05
ENSG00000249138	proteoglycan 3 pseudogene	SLED1	0.0311647	5.10742	3.27e-07	2.22e-05
ENSG00000268182	small integral membrane protein 17	SMIM17	-0.014634	-5.10417	3.32e-07	2.25e-05
ENSG00000170290	sarcolipin	SLN	-0.0293836	-5.102	3.36e-07	2.27e-05
ENSG00000173110	heat shock protein family A (Hsp70) member 6	HSPA6	0.0542849	5.10152	3.37e-07	2.27e-05
ENSG00000131378	raftlin, lipid raft linker 1	RFTN1	-0.00752936	-5.09299	3.52e-07	2.37e-05
ENSG00000258072		RP11-554D14.2	-0.0254245	-5.09232	3.54e-07	2.37e-05
ENSG00000162076	FLYWCH family member 2	FLYWCH2	-0.00981904	-5.09188	3.55e-07	2.37e-05
ENSG00000256538		RP11-847H18.3	-0.0254125	-5.08901	3.6e-07	2.4e-05
ENSG00000178363	calmodulin like 3	CALML3	-0.0254168	-5.08805	3.62e-07	2.41e-05
ENSG00000189108	interleukin 1 receptor accessory protein like 2	IL1RAPL2	-0.0114035	-5.08349	3.71e-07	2.46e-05
ENSG00000113389	natriuretic peptide receptor 3	NPR3	-0.0146764	-5.08168	3.74e-07	2.47e-05
ENSG00000106772	prune homolog 2	PRUNE2	0.0108338	5.0813	3.75e-07	2.47e-05
ENSG00000179088	chromosome 12 open reading frame 42	C12orf42	-0.0178344	-5.08101	3.75e-07	2.47e-05
ENSG00000176387	hydroxysteroid 11-beta dehydrogenase 2	HSD11B2	0.0261844	5.08085	3.76e-07	2.47e-05
ENSG00000167733	hydroxysteroid 11-beta dehydrogenase 1 like	HSD11B1L	-0.0126228	-5.08041	3.77e-07	2.47e-05
ENSG00000105855	integrin subunit beta 8	ITGB8	0.0101513	5.079	3.79e-07	2.48e-05
ENSG00000176974	serine hydroxymethyltransferase 1	SHMT1	0.0086425	5.07865	3.8e-07	2.48e-05
ENSG00000236581	STARD13 antisense RNA	STARD13-AS	0.016711	5.0785	3.8e-07	2.48e-05
ENSG00000226328	NUP50 antisense RNA 1 (head to head)	NUP50-AS1	-0.00971318	-5.07702	3.83e-07	2.49e-05
ENSG00000265313	long intergenic non-protein coding RNA 1476	LINC01476	-0.0177588	-5.07278	3.92e-07	2.54e-05
ENSG00000143164	DDB1 and CUL4 associated factor 6	DCAF6	-0.00944698	-5.07204	3.94e-07	2.55e-05
ENSG00000032389	EARP complex and GARP complex interacting protein 1	TSSC1	-0.00896425	-5.0691	4e-07	2.57e-05
ENSG00000142230	SUMO1 activating enzyme subunit 1	SAE1	-0.00927172	-5.06917	4e-07	2.57e-05
ENSG00000122863	carbohydrate sulfotransferase 3	CHST3	0.0150731	5.06749	4.03e-07	2.59e-05
ENSG00000113532	ST8 alpha-N-acetyl-neuraminide alpha-2,8-sialyltransferase 4	ST8SIA4	-0.00923084	-5.06533	4.08e-07	2.61e-05
ENSG00000165685	transmembrane protein 52B	TMEM52B	-0.0171799	-5.0622	4.14e-07	2.65e-05
ENSG00000050628	prostaglandin E receptor 3	PTGER3	-0.0247181	-5.05645	4.27e-07	2.73e-05
ENSG00000004948	calcitonin receptor	CALCR	-0.0237584	-5.04995	4.42e-07	2.81e-05
ENSG00000112335	sorting nexin 3	SNX3	-0.00899553	-5.04735	4.48e-07	2.84e-05
ENSG00000164171	integrin subunit alpha 2	ITGA2	0.0130212	5.04648	4.5e-07	2.85e-05
ENSG00000115041	potassium voltage-gated channel interacting protein 3	KCNIP3	-0.012039	-5.04361	4.57e-07	2.89e-05
ENSG00000157259	GATA zinc finger domain containing 1	GATAD1	0.0056964	5.04325	4.58e-07	2.89e-05
ENSG00000106443	PHD finger protein 14	PHF14	-0.00774443	-5.04005	4.65e-07	2.93e-05
ENSG00000241553	actin related protein 2/3 complex subunit 4	ARPC4	-0.0109234	-5.03826	4.7e-07	2.95e-05
ENSG00000135373	ETS homologous factor	EHF	0.0161832	5.03781	4.71e-07	2.95e-05
ENSG00000140287	histidine decarboxylase	HDC	-0.0263018	-5.03697	4.73e-07	2.95e-05
ENSG00000154079	succinate dehydrogenase complex assembly factor 4	SDHAF4	-0.0136665	-5.03498	4.78e-07	2.98e-05
ENSG00000048052	histone deacetylase 9	HDAC9	-0.00792201	-5.03447	4.79e-07	2.98e-05
ENSG00000078304	protein phosphatase 2 regulatory subunit B'gamma	PPP2R5C	-0.00693015	-5.03157	4.86e-07	3.01e-05
ENSG00000007062	prominin 1	PROM1	-0.0114557	-5.03097	4.88e-07	3.01e-05
ENSG00000112297	crystallin beta-gamma domain containing 1	AIM1	0.0118224	5.03022	4.9e-07	3.01e-05
ENSG00000188385	Janus kinase and microtubule interacting protein 3	JAKMIP3	0.009979	5.0302	4.9e-07	3.01e-05
ENSG00000150779	translocase of inner mitochondrial membrane 8 homolog B	TIMM8B	-0.0115267	-5.02831	4.95e-07	3.03e-05
ENSG00000102174	phosphate regulating endopeptidase homolog X-linked	PHEX	0.013644	5.02517	5.03e-07	3.08e-05
ENSG00000231185	SPRY4 antisense RNA 1	AC005592.2	-0.0141363	-5.02341	5.08e-07	3.1e-05
ENSG00000185909	kelch domain containing 8B	KLHDC8B	-0.0106983	-5.02204	5.11e-07	3.11e-05
ENSG00000175287	phytanoyl-CoA dioxygenase domain containing 1	PHYHD1	0.0146204	5.01865	5.2e-07	3.16e-05
ENSG00000114383	tumor suppressor candidate 2	TUSC2	-0.0092458	-5.01776	5.23e-07	3.17e-05
ENSG00000181991	mitochondrial ribosomal protein S11	MRPS11	-0.00810125	-5.01649	5.26e-07	3.18e-05
ENSG00000241563	cortistatin	CORT	-0.0188292	-5.01517	5.3e-07	3.2e-05
ENSG00000144120	transmembrane protein 177	TMEM177	-0.00749604	-5.01381	5.34e-07	3.21e-05
ENSG00000165309	armadillo repeat containing 3	ARMC3	0.0130074	5.01226	5.38e-07	3.23e-05
ENSG00000188263	interleukin 17 receptor E like	IL17REL	-0.0339713	-5.00972	5.45e-07	3.26e-05
ENSG00000105671	DEAD-box helicase 49	DDX49	-0.0096647	-5.00975	5.45e-07	3.26e-05
ENSG00000234754	uncharacterized LOC400804	C1orf140	0.041769	5.00921	5.47e-07	3.26e-05
ENSG00000111737	RAB35, member RAS oncogene family	RAB35	-0.00832798	-5.00875	5.48e-07	3.26e-05
ENSG00000203710	complement C3b/C4b receptor 1 (Knops blood group)	CR1	0.0254388	5.00606	5.56e-07	3.3e-05
ENSG00000224389	complement C4B (Chido blood group)	C4B	0.0238223	5.00213	5.67e-07	3.36e-05
ENSG00000226751		AF127936.5	-0.020071	-4.99703	5.82e-07	3.44e-05
ENSG00000008226	deleted in lung and esophageal cancer 1	DLEC1	0.0160185	4.99481	5.89e-07	3.48e-05
ENSG00000108861	dual specificity phosphatase 3	DUSP3	-0.00670307	-4.99408	5.91e-07	3.48e-05
ENSG00000241218		RP11-446H18.1	0.0169163	4.99291	5.95e-07	3.49e-05
ENSG00000128596	coiled-coil domain containing 136	CCDC136	-0.00761538	-4.99212	5.97e-07	3.49e-05
ENSG00000125772	glycerophosphocholine phosphodiesterase 1	GPCPD1	-0.0101825	-4.99225	5.97e-07	3.49e-05
ENSG00000114200	butyrylcholinesterase	BCHE	-0.011681	-4.99099	6.01e-07	3.51e-05
ENSG00000183654	membrane associated ring-CH-type finger 11	2018-03-11	-0.0115693	-4.99067	6.02e-07	3.51e-05
ENSG00000056558	TNF receptor associated factor 1	TRAF1	0.0119296	4.98864	6.08e-07	3.54e-05
ENSG00000164136	interleukin 15	IL15	0.0152481	4.98386	6.23e-07	3.62e-05
ENSG00000257315	zinc finger BED-type containing 6	ZBED6	0.0121409	4.98225	6.28e-07	3.64e-05
ENSG00000187398	leucine zipper protein 2	LUZP2	-0.0101583	-4.98103	6.32e-07	3.65e-05
ENSG00000187474	formyl peptide receptor 3	FPR3	0.02553	4.98033	6.35e-07	3.66e-05
ENSG00000184117	nipsnap homolog 1	NIPSNAP1	-0.00967891	-4.97888	6.4e-07	3.68e-05
ENSG00000188004	small nucleolar RNA host gene 28	C1orf204	-0.00925907	-4.97856	6.41e-07	3.68e-05
ENSG00000186566	G-patch domain containing 8	GPATCH8	0.0106023	4.97268	6.6e-07	3.78e-05
ENSG00000113971	nephrocystin 3	NPHP3	0.00873333	4.97067	6.67e-07	3.81e-05
ENSG00000169213	RAB3B, member RAS oncogene family	RAB3B	-0.0134295	-4.96555	6.85e-07	3.91e-05
ENSG00000250067	YjeF N-terminal domain containing 3	YJEFN3	-0.0154414	-4.96496	6.87e-07	3.91e-05
ENSG00000086506	hemoglobin subunit theta 1	HBQ1	-0.0190156	-4.962	6.98e-07	3.96e-05
ENSG00000235597	long intergenic non-protein coding RNA 1102	LINC01102	-0.00945914	-4.95777	7.13e-07	4.04e-05
ENSG00000102468	5-hydroxytryptamine receptor 2A	HTR2A	-0.0121246	-4.94844	7.48e-07	4.23e-05
ENSG00000147394	zinc finger protein 185 with LIM domain	ZNF185	0.00850453	4.94809	7.49e-07	4.23e-05
ENSG00000120820	glycosyltransferase 8 domain containing 2	GLT8D2	-0.00748036	-4.94426	7.64e-07	4.3e-05
ENSG00000102981	par-6 family cell polarity regulator alpha	PARD6A	-0.00995087	-4.93816	7.89e-07	4.43e-05
ENSG00000146007	zinc finger matrin-type 2	ZMAT2	-0.0151576	-4.93664	7.95e-07	4.45e-05
ENSG00000158747	neuroblastoma 1, DAN family BMP antagonist	NBL1	-0.0113591	-4.93629	7.96e-07	4.45e-05
ENSG00000181418	dendrin	DDN	-0.010337	-4.93641	7.96e-07	4.45e-05
ENSG00000184611	potassium voltage-gated channel subfamily H member 7	KCNH7	-0.00901317	-4.93395	8.06e-07	4.49e-05
ENSG00000169220	regulator of G protein signaling 14	RGS14	-0.011731	-4.93377	8.07e-07	4.49e-05
ENSG00000227579		RP1-35C21.2	-0.0188774	-4.93319	8.09e-07	4.49e-05
ENSG00000198668	calmodulin 1	CALM1	-0.00861218	-4.93083	8.19e-07	4.53e-05
ENSG00000128581	intraflagellar transport 22	IFT22	-0.0073165	-4.92959	8.24e-07	4.55e-05
ENSG00000053524	MCF.2 cell line derived transforming sequence-like 2	MCF2L2	0.00652705	4.92734	8.34e-07	4.6e-05
ENSG00000166863	tachykinin 3	TAC3	-0.0133107	-4.92571	8.41e-07	4.63e-05
ENSG00000146232	NFKB inhibitor epsilon	NFKBIE	-0.00881391	-4.92104	8.61e-07	4.73e-05
ENSG00000226314	zinc finger protein 192 pseudogene 1	ZNF192P1	0.0121085	4.92065	8.63e-07	4.73e-05
ENSG00000188315	chromosome 3 open reading frame 62	C3orf62	0.00830917	4.9184	8.73e-07	4.77e-05
ENSG00000143858	synaptotagmin 2	SYT2	0.0161893	4.91619	8.82e-07	4.82e-05
ENSG00000184144	contactin 2	CNTN2	0.01258	4.91352	8.95e-07	4.87e-05
ENSG00000108349	cancer susceptibility 3	CASC3	0.006718	4.90885	9.16e-07	4.97e-05
ENSG00000197620	chromosome X open reading frame 40A	CXorf40A	-0.0108615	-4.90857	9.17e-07	4.97e-05
ENSG00000161896	inositol hexakisphosphate kinase 3	IP6K3	0.0201807	4.90855	9.18e-07	4.97e-05
ENSG00000205488	CALML3 antisense RNA 1	CALML3-AS1	-0.0172387	-4.90725	9.24e-07	4.99e-05
ENSG00000214113	LYR motif containing 4	LYRM4	-0.00905576	-4.90196	9.49e-07	5.12e-05
ENSG00000119383	protein phosphatase 2 phosphatase activator	PTPA	-0.00863551	-4.89787	9.69e-07	5.21e-05
ENSG00000108829	leucine rich repeat containing 59	LRRC59	-0.00540741	-4.89729	9.72e-07	5.22e-05
ENSG00000188269	olfactory receptor family 7 subfamily A member 5	OR7A5	0.0492176	4.89592	9.78e-07	5.25e-05
ENSG00000136492	BRCA1 interacting protein C-terminal helicase 1	BRIP1	0.0125012	4.89454	9.85e-07	5.26e-05
ENSG00000189056	reelin	RELN	-0.0145009	-4.89456	9.85e-07	5.26e-05
ENSG00000090905	trinucleotide repeat containing 6A	TNRC6A	0.00887551	4.89352	9.91e-07	5.28e-05
ENSG00000173208	ATP binding cassette subfamily D member 2	ABCD2	-0.0108487	-4.89264	9.95e-07	5.29e-05
ENSG00000119782	FK506 binding protein 1B	FKBP1B	-0.0138725	-4.89156	1e-06	5.31e-05
ENSG00000129991	troponin I3, cardiac type	TNNI3	-0.0328815	-4.88944	1.01e-06	5.36e-05
ENSG00000185436	interferon lambda receptor 1	IFNLR1	0.0114828	4.88812	1.02e-06	5.37e-05
ENSG00000156973	phosphodiesterase 6D	PDE6D	-0.00743805	-4.88723	1.02e-06	5.39e-05
ENSG00000153558	F-box and leucine rich repeat protein 2	FBXL2	-0.00924684	-4.88853	1.02e-06	5.37e-05
ENSG00000187556	nanos C2HC-type zinc finger 3	NANOS3	-0.0132453	-4.88372	1.04e-06	5.46e-05
ENSG00000137727	Rho GTPase activating protein 20	ARHGAP20	-0.00953466	-4.88433	1.04e-06	5.45e-05
ENSG00000089041	purinergic receptor P2X 7	P2RX7	0.0117062	4.88184	1.05e-06	5.49e-05
ENSG00000232119	MCTS1, re-initiation and release factor	MCTS1	-0.0120431	-4.88271	1.05e-06	5.48e-05
ENSG00000158296	solute carrier family 13 member 3	SLC13A3	0.0113209	4.87939	1.06e-06	5.54e-05
ENSG00000177868	small vasohibin binding protein	SVBP	-0.00951315	-4.87963	1.06e-06	5.54e-05
ENSG00000163673	doublecortin like kinase 3	DCLK3	-0.0138705	-4.87827	1.07e-06	5.56e-05
ENSG00000071991	cadherin 19	CDH19	0.0177142	4.87598	1.08e-06	5.61e-05
ENSG00000054690	pleckstrin homology, MyTH4 and FERM domain containing H1	PLEKHH1	0.0148967	4.86915	1.12e-06	5.79e-05
ENSG00000239900	adenylosuccinate lyase	ADSL	-0.00675979	-4.86979	1.12e-06	5.78e-05
ENSG00000221995	TGFB1-induced anti-apoptotic factor 1	TIAF1	0.0155326	4.86808	1.13e-06	5.81e-05
ENSG00000186297	gamma-aminobutyric acid type A receptor alpha5 subunit	GABRA5	-0.0107897	-4.86594	1.14e-06	5.86e-05
ENSG00000138670	RasGEF domain family member 1B	RASGEF1B	-0.00848527	-4.8639	1.15e-06	5.89e-05
ENSG00000154822	phospholipase C like 2	PLCL2	-0.0112698	-4.86485	1.15e-06	5.87e-05
ENSG00000127472	phospholipase A2 group V	PLA2G5	-0.0172593	-4.86486	1.15e-06	5.87e-05
ENSG00000110442	COMM domain containing 9	COMMD9	-0.00712723	-4.86286	1.16e-06	5.91e-05
ENSG00000231490	ribosomal protein L7 like 1 pseudogene 2	RPL7L1P2	0.0220993	4.85577	1.2e-06	6.1e-05
ENSG00000129636	integrin alpha FG-GAP repeat containing 1	ITFG1	-0.012707	-4.85584	1.2e-06	6.1e-05
ENSG00000187699	chromosome 2 open reading frame 88	C2orf88	0.0102083	4.85368	1.21e-06	6.15e-05
ENSG00000107331	ATP binding cassette subfamily A member 2	ABCA2	0.0133603	4.85293	1.22e-06	6.17e-05
ENSG00000253636		RP11-531A24.5	0.0189528	4.85169	1.22e-06	6.18e-05
ENSG00000115155	otoferlin	OTOF	-0.01194	-4.85254	1.22e-06	6.17e-05
ENSG00000171791	BCL2, apoptosis regulator	BCL2	0.00760027	4.85091	1.23e-06	6.19e-05
ENSG00000198915	RasGEF domain family member 1A	RASGEF1A	-0.00623305	-4.8455	1.26e-06	6.34e-05
ENSG00000183734	achaete-scute family bHLH transcription factor 2	ASCL2	-0.0274532	-4.84642	1.26e-06	6.32e-05
ENSG00000147041	synaptotagmin like 5	SYTL5	-0.0115992	-4.84393	1.27e-06	6.37e-05
ENSG00000104904	ornithine decarboxylase antizyme 1	OAZ1	-0.0100998	-4.84517	1.27e-06	6.34e-05
ENSG00000109771	LRP2 binding protein	LRP2BP	0.00961533	4.83762	1.31e-06	6.55e-05
ENSG00000150394	cadherin 8	CDH8	-0.0108828	-4.8386	1.31e-06	6.53e-05
ENSG00000198842	dual specificity phosphatase 27, atypical	DUSP27	-0.014946	-4.83611	1.32e-06	6.59e-05
ENSG00000154144	transforming growth factor beta regulator 1	TBRG1	-0.00715649	-4.83494	1.33e-06	6.61e-05
ENSG00000091879	angiopoietin 2	ANGPT2	0.0196866	4.83302	1.34e-06	6.66e-05
ENSG00000012124	CD22 molecule	CD22	0.0184339	4.83266	1.35e-06	6.66e-05
ENSG00000136436	calcium binding and coiled-coil domain 2	CALCOCO2	0.0106252	4.83179	1.35e-06	6.67e-05
ENSG00000159685	coiled-coil-helix-coiled-coil-helix domain containing 6	CHCHD6	-0.010932	-4.83172	1.35e-06	6.67e-05
ENSG00000144681	SH3 and cysteine rich domain	STAC	-0.0203225	-4.82825	1.38e-06	6.78e-05
ENSG00000134817	apelin receptor	APLNR	0.0204005	4.82498	1.4e-06	6.87e-05
ENSG00000126091	ST3 beta-galactoside alpha-2,3-sialyltransferase 3	ST3GAL3	-0.00685637	-4.82475	1.4e-06	6.87e-05
ENSG00000231738	tetraspanin 19	TSPAN19	0.0160322	4.82387	1.41e-06	6.89e-05
ENSG00000137462	toll like receptor 2	TLR2	0.018802	4.82227	1.42e-06	6.93e-05
ENSG00000243156	microtubule associated monooxygenase, calponin and LIM domain containing 3	MICAL3	0.0104158	4.82037	1.43e-06	6.98e-05
ENSG00000155269	G protein-coupled receptor 78	GPR78	-0.0333003	-4.81892	1.44e-06	7.02e-05
ENSG00000026508	CD44 molecule (Indian blood group)	CD44	0.0255175	4.81347	1.48e-06	7.2e-05
ENSG00000253667		RP11-30L15.4	0.016905	4.81213	1.49e-06	7.23e-05
ENSG00000156219	ADP-ribosyltransferase 3	ART3	0.00967032	4.81202	1.49e-06	7.23e-05
ENSG00000223945		RP11-458I7.1	0.0182816	4.81154	1.5e-06	7.23e-05
ENSG00000196169	kinesin family member 19	KIF19	0.024105	4.80645	1.54e-06	7.41e-05
ENSG00000106113	corticotropin releasing hormone receptor 2	CRHR2	0.0187932	4.80394	1.56e-06	7.49e-05
ENSG00000145692	betaine--homocysteine S-methyltransferase	BHMT	-0.018324	-4.80234	1.57e-06	7.52e-05
ENSG00000141699	reticulophagy regulator family member 3	FAM134C	-0.00552795	-4.80241	1.57e-06	7.52e-05
ENSG00000188783	proline and arginine rich end leucine rich repeat protein	PRELP	0.0215964	4.79769	1.61e-06	7.68e-05
ENSG00000122584	neurexophilin 1	NXPH1	-0.0114621	-4.79649	1.61e-06	7.72e-05
ENSG00000224404		LL22NC03-13G6.2	-0.01858	-4.79484	1.63e-06	7.77e-05
ENSG00000143158	mitochondrial pyruvate carrier 2	MPC2	-0.0118302	-4.79282	1.64e-06	7.83e-05
ENSG00000242412	diazepam binding inhibitor-like 5 pseudogene 2	DBIL5P2	0.0190693	4.79214	1.65e-06	7.84e-05
ENSG00000168906	methionine adenosyltransferase 2A	MAT2A	0.00767453	4.79091	1.66e-06	7.88e-05
ENSG00000250107	CACNA1G antisense RNA 1	CACNA1G-AS1	-0.0195723	-4.78941	1.67e-06	7.92e-05
ENSG00000100985	matrix metallopeptidase 9	MMP9	0.0496591	4.78766	1.69e-06	7.98e-05
ENSG00000174145	NACHT and WD repeat domain containing 2	NWD2	-0.0118399	-4.78558	1.7e-06	8.02e-05
ENSG00000126259	kirre like nephrin family adhesion molecule 2	KIRREL2	-0.0156372	-4.78565	1.7e-06	8.02e-05
ENSG00000158792	spermatogenesis associated 2 like	SPATA2L	-0.0135839	-4.78607	1.7e-06	8.02e-05
ENSG00000254314		RP11-26M5.3	0.0283749	4.78429	1.72e-06	8.06e-05
ENSG00000236252	uncharacterized LOC101928381	RP11-15J10.8	0.0213355	4.7832	1.73e-06	8.09e-05
ENSG00000171723	gephyrin	GPHN	-0.00428423	-4.78108	1.74e-06	8.16e-05
ENSG00000133265	HSPA (Hsp70) binding protein 1	HSPBP1	-0.0114001	-4.77896	1.76e-06	8.23e-05
ENSG00000243175	ribosomal protein SA pseudogene 36	RPSAP36	0.0162053	4.7782	1.77e-06	8.24e-05
ENSG00000198000	nucleolar protein 8	NOL8	0.00686325	4.77796	1.77e-06	8.24e-05
ENSG00000064205	WNT1 inducible signaling pathway protein 2	WISP2	0.0167806	4.77734	1.78e-06	8.25e-05
ENSG00000235194	protein phosphatase 1 regulatory subunit 3E	PPP1R3E	0.00663166	4.77425	1.8e-06	8.34e-05
ENSG00000125967	N-terminal EF-hand calcium binding protein 3	NECAB3	-0.00851711	-4.77507	1.8e-06	8.33e-05
ENSG00000203724	chromosome 1 open reading frame 53	C1orf53	-0.0143173	-4.77411	1.81e-06	8.34e-05
ENSG00000117152	regulator of G protein signaling 4	RGS4	-0.0169648	-4.77197	1.82e-06	8.42e-05
ENSG00000101463	synapse differentiation inducing 1	SYNDIG1	-0.00809278	-4.77077	1.84e-06	8.46e-05
ENSG00000128294	tyrosylprotein sulfotransferase 2	TPST2	-0.00755965	-4.76872	1.85e-06	8.53e-05
ENSG00000115661	serine/threonine kinase 16	STK16	-0.00858113	-4.76764	1.86e-06	8.56e-05
ENSG00000165609	nudix hydrolase 5	NUDT5	0.00541453	4.76666	1.87e-06	8.59e-05
ENSG00000103742	immunoglobulin superfamily DCC subclass member 4	IGDCC4	0.0131283	4.76625	1.88e-06	8.59e-05
ENSG00000139178	complement C1r subcomponent like	C1RL	0.0114929	4.76325	1.91e-06	8.7e-05
ENSG00000100784	ribosomal protein S6 kinase A5	RPS6KA5	0.00774754	4.76233	1.91e-06	8.73e-05
ENSG00000143494	vasohibin 2	VASH2	0.0124591	4.76115	1.92e-06	8.76e-05
ENSG00000141759	thioredoxin like 4A	TXNL4A	-0.00995502	-4.7596	1.94e-06	8.82e-05
ENSG00000187010	Rh blood group D antigen	RHD	0.0223986	4.75796	1.96e-06	8.87e-05
ENSG00000172137	calbindin 2	CALB2	-0.0145777	-4.75668	1.97e-06	8.91e-05
ENSG00000160050	coiled-coil domain containing 28B	CCDC28B	-0.0113194	-4.7559	1.98e-06	8.93e-05
ENSG00000244187	transmembrane protein 141	TMEM141	-0.0112781	-4.75132	2.02e-06	9.12e-05
ENSG00000123415	single-strand-selective monofunctional uracil-DNA glycosylase 1	SMUG1	-0.00808332	-4.74816	2.05e-06	9.25e-05
ENSG00000138698	Rap1 GTPase-GDP dissociation stimulator 1	RAP1GDS1	-0.00951853	-4.74716	2.06e-06	9.28e-05
ENSG00000169021	ubiquinol-cytochrome c reductase, Rieske iron-sulfur polypeptide 1	UQCRFS1	-0.0107425	-4.74436	2.09e-06	9.38e-05
ENSG00000185361	TNF alpha induced protein 8 like 1	TNFAIP8L1	-0.00882626	-4.74476	2.09e-06	9.38e-05
ENSG00000214688	chromosome 10 open reading frame 105	C10orf105	0.0232426	4.74399	2.1e-06	9.38e-05
ENSG00000230989	heat shock factor binding protein 1	HSBP1	-0.00965743	-4.74362	2.1e-06	9.38e-05
ENSG00000196517	solute carrier family 6 member 9	SLC6A9	0.0143581	4.7422	2.11e-06	9.42e-05
ENSG00000184900	small ubiquitin-like modifier 3	SUMO3	-0.00953414	-4.74233	2.11e-06	9.42e-05
ENSG00000105887	myotrophin	MTPN	-0.00794185	-4.74167	2.12e-06	9.43e-05
ENSG00000178980	selenoprotein W	SELENOW	-0.0112819	-4.74037	2.13e-06	9.45e-05
ENSG00000068650	ATPase phospholipid transporting 11A	ATP11A	0.0124075	4.74015	2.14e-06	9.45e-05
ENSG00000225860	long intergenic non-protein coding RNA 2072	RP11-1018N14.2	0.0200956	4.73947	2.14e-06	9.45e-05
ENSG00000124766	SRY-box 4	SOX4	-0.0118888	-4.73949	2.14e-06	9.45e-05
ENSG00000143549	tropomyosin 3	TPM3	-0.00832534	-4.73964	2.14e-06	9.45e-05
ENSG00000137692	defective in cullin neddylation 1 domain containing 5	DCUN1D5	-0.00635214	-4.73898	2.15e-06	9.46e-05
ENSG00000101266	casein kinase 2 alpha 1	CSNK2A1	-0.00622718	-4.73683	2.17e-06	9.54e-05
ENSG00000087095	nemo like kinase	NLK	-0.00735048	-4.73481	2.19e-06	9.62e-05
ENSG00000168291	pyruvate dehydrogenase E1 beta subunit	PDHB	-0.0103709	-4.73366	2.21e-06	9.66e-05
ENSG00000074416	monoglyceride lipase	MGLL	-0.00774772	-4.73206	2.22e-06	9.72e-05
ENSG00000157368	interleukin 34	IL34	-0.0128197	-4.73129	2.23e-06	9.74e-05
ENSG00000184949	family with sequence similarity 227 member A	FAM227A	0.0111015	4.72889	2.26e-06	9.83e-05
ENSG00000170423	keratin 78	KRT78	-0.0561912	-4.72908	2.26e-06	9.83e-05
ENSG00000115641	four and a half LIM domains 2	FHL2	-0.00843612	-4.7277	2.27e-06	9.85e-05
ENSG00000148335	N-terminal Xaa-Pro-Lys N-methyltransferase 1	NTMT1	-0.00965548	-4.72801	2.27e-06	9.85e-05
ENSG00000267199	uncharacterized LOC105371998	RP11-861E21.2	0.013552	4.72508	2.3e-06	9.96e-05
ENSG00000141542	RAB40B, member RAS oncogene family	RAB40B	-0.00591813	-4.72309	2.32e-06	0.000100304
ENSG00000186162	cell death-inducing DFFA-like effector c pseudogene	CIDECP	-0.00892275	-4.72359	2.32e-06	0.000100219
ENSG00000115468	EF-hand domain family member D1	EFHD1	0.0140352	4.71915	2.37e-06	0.00010194
ENSG00000131475	vacuolar protein sorting 25 homolog	VPS25	-0.0100044	-4.71782	2.38e-06	0.000102446
ENSG00000101152	DnaJ heat shock protein family (Hsp40) member C5	DNAJC5	-0.00754953	-4.71707	2.39e-06	0.000102658
ENSG00000151948	glycosyltransferase 1 domain containing 1	GLT1D1	-0.00926958	-4.7154	2.41e-06	0.000103338
ENSG00000160688	flavin adenine dinucleotide synthetase 1	FLAD1	-0.0075583	-4.71133	2.46e-06	0.000105255
ENSG00000150556	LY6/PLAUR domain containing 6B	LYPD6B	-0.0116579	-4.70856	2.49e-06	0.000106527
ENSG00000103316	crystallin mu	CRYM	-0.0173198	-4.708	2.5e-06	0.000106654
ENSG00000179532	dynein heavy chain domain 1	DNHD1	0.0119744	4.70707	2.51e-06	0.000106971
ENSG00000251562	metastasis associated lung adenocarcinoma transcript 1 (non-protein coding)	MALAT1	0.0138116	4.705	2.54e-06	0.000107785
ENSG00000090971	N-acetyltransferase 14 (putative)	NAT14	-0.0127259	-4.70487	2.54e-06	0.000107785
ENSG00000002016	RAD52 homolog, DNA repair protein	RAD52	0.0101635	4.70441	2.55e-06	0.00010786
ENSG00000147224	phosphoribosyl pyrophosphate synthetase 1	PRPS1	-0.0102452	-4.70309	2.56e-06	0.000108388
ENSG00000159086	PAX3 and PAX7 binding protein 1	PAXBP1	0.00704499	4.69744	2.63e-06	0.00011108
ENSG00000187094	cholecystokinin	CCK	-0.0171767	-4.69753	2.63e-06	0.00011108
ENSG00000069998	haloacid dehalogenase like hydrolase domain containing 5	CECR5	-0.00704451	-4.697	2.64e-06	0.000111146
ENSG00000143801	presenilin 2	PSEN2	-0.00849837	-4.69602	2.65e-06	0.000111504
ENSG00000147488	ST18, C2H2C-type zinc finger	ST18	0.0150569	4.6924	2.7e-06	0.000113307
ENSG00000013441	CDC like kinase 1	CLK1	0.00854769	4.69178	2.71e-06	0.000113307
ENSG00000170324	FERM and PDZ domain containing 2	FRMPD2	-0.0141596	-4.69181	2.71e-06	0.000113307
ENSG00000115226	fibronectin type III domain containing 4	FNDC4	-0.0100945	-4.69074	2.72e-06	0.000113535
ENSG00000129682	fibroblast growth factor 13	FGF13	-0.010143	-4.69117	2.72e-06	0.000113472
ENSG00000103035	proteasome 26S subunit, non-ATPase 7	PSMD7	-0.00854719	-4.68827	2.76e-06	0.000114735
ENSG00000226306	neuropeptide Y receptor Y6 (pseudogene)	NPY6R	0.0149097	4.685	2.8e-06	0.000116342
ENSG00000064995	TATA-box binding protein associated factor 11	TAF11	-0.00804124	-4.68479	2.8e-06	0.000116342
ENSG00000184564	SLIT and NTRK like family member 6	SLITRK6	-0.0209484	-4.68434	2.81e-06	0.000116413
ENSG00000163251	frizzled class receptor 5	FZD5	0.0109753	4.68307	2.83e-06	0.00011678
ENSG00000168569	transmembrane protein 223	TMEM223	-0.00849309	-4.68114	2.85e-06	0.000117705
ENSG00000171476	HOP homeobox	HOPX	-0.0126163	-4.67866	2.89e-06	0.000118951
ENSG00000112972	3-hydroxy-3-methylglutaryl-CoA synthase 1	HMGCS1	-0.0107137	-4.67145	2.99e-06	0.000123017
ENSG00000237190	CDKN2A interacting protein N-terminal like	CDKN2AIPNL	-0.0113457	-4.67068	3e-06	0.000123104
ENSG00000161203	adaptor related protein complex 2 mu 1 subunit	AP2M1	-0.0110265	-4.67072	3e-06	0.000123104
ENSG00000205002	alanine and arginine rich domain containing protein	AARD	-0.0175543	-4.66975	3.02e-06	0.000123473
ENSG00000173598	nudix hydrolase 4	NUDT4	-0.00788289	-4.66849	3.03e-06	0.000124043
ENSG00000260790	uncharacterized LOC440346	RP11-21M24.2	0.0241021	4.6643	3.1e-06	0.000126405
ENSG00000164076	CaM kinase like vesicle associated	CAMKV	-0.010365	-4.66342	3.11e-06	0.000126657
ENSG00000145242	EPH receptor A5	EPHA5	-0.0124147	-4.66295	3.12e-06	0.000126657
ENSG00000086504	mitochondrial ribosomal protein L28	MRPL28	-0.012766	-4.66053	3.15e-06	0.00012777
ENSG00000143013	LIM domain only 4	LMO4	-0.0120781	-4.66111	3.15e-06	0.000127605
ENSG00000161835	general receptor for phosphoinositides 1 associated scaffold protein	GRASP	-0.0133607	-4.65992	3.16e-06	0.000127958
ENSG00000069702	transforming growth factor beta receptor 3	TGFBR3	0.0100634	4.65865	3.18e-06	0.000128553
ENSG00000118971	cyclin D2	CCND2	-0.0069906	-4.65797	3.19e-06	0.000128786
ENSG00000100122	crystallin beta B1	CRYBB1	-0.0163629	-4.65416	3.25e-06	0.000130996
ENSG00000121769	fatty acid binding protein 3	FABP3	-0.0149088	-4.65374	3.26e-06	0.000131068
ENSG00000110079	membrane spanning 4-domains A4A	MS4A4A	0.0230237	4.65033	3.31e-06	0.000132813
ENSG00000143632	actin, alpha 1, skeletal muscle	ACTA1	-0.0185746	-4.65034	3.31e-06	0.000132813
ENSG00000233122	CTAGE family member 7, pseudogene	CTAGE7P	0.0145942	4.65009	3.32e-06	0.000132813
ENSG00000111669	triosephosphate isomerase 1	TPI1	-0.0149272	-4.64908	3.33e-06	0.000133151
ENSG00000120693	SMAD family member 9	SMAD9	0.0090373	4.64873	3.34e-06	0.000133151
ENSG00000133477	family with sequence similarity 83 member F	FAM83F	-0.0287277	-4.64853	3.34e-06	0.000133151
ENSG00000187066	transmembrane protein 262	TMEM262	0.0121345	4.64834	3.35e-06	0.000133151
ENSG00000244731	complement C4B (Chido blood group)	C4A	0.024524	4.6475	3.36e-06	0.000133298
ENSG00000101189	MRG domain binding protein	MRGBP	-0.00611164	-4.6476	3.36e-06	0.000133298
ENSG00000119865	cannabinoid receptor interacting protein 1	CNRIP1	-0.0065744	-4.64495	3.4e-06	0.000134751
ENSG00000243083	long intergenic non-protein coding RNA 870	LINC00870	0.0183075	4.64321	3.43e-06	0.000135294
ENSG00000128482	ring finger protein 112	RNF112	-0.00882566	-4.64339	3.43e-06	0.000135294
ENSG00000138472	guanylate cyclase activator 1C	GUCA1C	-0.0308851	-4.63796	3.52e-06	0.000138373
ENSG00000115474	potassium voltage-gated channel subfamily J member 13	KCNJ13	0.0122526	4.63582	3.56e-06	0.000139437
ENSG00000172020	growth associated protein 43	GAP43	-0.0137946	-4.63526	3.56e-06	0.000139575
ENSG00000187446	calcineurin like EF-hand protein 1	CHP1	-0.00658303	-4.63577	3.56e-06	0.000139437
ENSG00000175040	carbohydrate sulfotransferase 2	CHST2	-0.0084154	-4.63333	3.6e-06	0.00014068
ENSG00000215424	MCM3AP antisense RNA 1	MCM3AP-AS1	0.00971859	4.63232	3.62e-06	0.000140999
ENSG00000232486		RP11-18B3.2	0.0164584	4.63226	3.62e-06	0.000140999
ENSG00000122966	citron rho-interacting serine/threonine kinase	CIT	0.00988843	4.62797	3.69e-06	0.000143648
ENSG00000109458	GRB2 associated binding protein 1	GAB1	0.0101395	4.62762	3.7e-06	0.000143648
ENSG00000149527	phospholipase C eta 2	PLCH2	-0.0101335	-4.6275	3.7e-06	0.000143648
ENSG00000103404	ubiquitin specific peptidase 31	USP31	0.00787263	4.62657	3.72e-06	0.000144093
ENSG00000053438	neuronatin	NNAT	-0.0132947	-4.62516	3.74e-06	0.000144654
ENSG00000135525	microtubule associated protein 7	MAP7	0.00661142	4.62491	3.75e-06	0.000144654
ENSG00000254746		RP11-958J22.1	0.0123715	4.62487	3.75e-06	0.000144654
ENSG00000124942	AHNAK nucleoprotein	AHNAK	0.0127754	4.62342	3.77e-06	0.00014546
ENSG00000056736	interleukin 17 receptor B	IL17RB	0.00950799	4.62189	3.8e-06	0.000146039
ENSG00000050344	nuclear factor, erythroid 2 like 3	NFE2L3	0.0109128	4.62175	3.81e-06	0.000146039
ENSG00000263235		RP11-461A8.4	0.0267579	4.62156	3.81e-06	0.000146039
ENSG00000250510	G protein-coupled receptor 162	GPR162	-0.0102583	-4.62124	3.81e-06	0.000146039
ENSG00000166819	perilipin 1	PLIN1	0.0159659	4.62111	3.82e-06	0.000146039
ENSG00000146592	cAMP responsive element binding protein 5	CREB5	0.0134011	4.62064	3.83e-06	0.000146163
ENSG00000146666	long intergenic non-protein coding RNA 525	LINC00525	0.0276314	4.62011	3.84e-06	0.000146169
ENSG00000101363	mannosidase beta like	MANBAL	-0.00690495	-4.62004	3.84e-06	0.000146169
ENSG00000067221	stomatin like 1	STOML1	-0.0105594	-4.61899	3.86e-06	0.000146703
ENSG00000060140	serine/threonine/tyrosine kinase 1	STYK1	-0.0135478	-4.61811	3.87e-06	0.000147117
ENSG00000111817	dermatan sulfate epimerase	DSE	0.00905305	4.61735	3.89e-06	0.000147448
ENSG00000211450	selenoprotein H	SELENOH	-0.0131599	-4.61665	3.9e-06	0.000147738
ENSG00000163466	actin related protein 2/3 complex subunit 2	ARPC2	-0.00567586	-4.61461	3.94e-06	0.000148987
ENSG00000088992	tescalcin	TESC	-0.0118857	-4.61416	3.95e-06	0.000149097
ENSG00000187713	transmembrane protein 203	TMEM203	-0.00688202	-4.61308	3.97e-06	0.000149666
ENSG00000165929	tandem C2 domains, nuclear	TC2N	-0.0138773	-4.61181	3.99e-06	0.000150369
ENSG00000180638	solute carrier family 47 member 2	SLC47A2	0.0166795	4.61007	4.03e-06	0.000151211
ENSG00000077549	capping actin protein of muscle Z-line beta subunit	CAPZB	-0.00516727	-4.60901	4.05e-06	0.00015177
ENSG00000242600	mannose binding lectin 1, pseudogene	MBL1P	0.0113521	4.60815	4.06e-06	0.000152192
ENSG00000176697	brain derived neurotrophic factor	BDNF	-0.0158077	-4.60552	4.11e-06	0.000153481
ENSG00000109762	sorting nexin 25	SNX25	-0.00664414	-4.60567	4.11e-06	0.000153481
ENSG00000100908	ER membrane protein complex subunit 9	EMC9	-0.0108624	-4.60581	4.11e-06	0.000153481
ENSG00000196972	small integral membrane protein 10 like 2B	SMIM10L2B	-0.0107234	-4.60469	4.13e-06	0.000153885
ENSG00000145681	hyaluronan and proteoglycan link protein 1	HAPLN1	-0.0142376	-4.60064	4.21e-06	0.000156675
ENSG00000259358		RP11-456J20.1	0.0156763	4.60008	4.22e-06	0.000156675
ENSG00000131966	actin related protein 10 homolog	ACTR10	-0.0108513	-4.60019	4.22e-06	0.000156675
ENSG00000147535	phospholipid phosphatase 5	PLPP5	0.0054705	4.59916	4.24e-06	0.000157154
ENSG00000072201	ligand of numb-protein X 1	LNX1	-0.0110495	-4.59866	4.25e-06	0.000157313
ENSG00000089775	zinc finger and BTB domain containing 25	ZBTB25	0.00756018	4.5981	4.26e-06	0.000157516
ENSG00000141429	polypeptide N-acetylgalactosaminyltransferase 1	GALNT1	-0.00833993	-4.59657	4.29e-06	0.00015846
ENSG00000218226	TatD DNase domain containing 2 pseudogene 2	TATDN2P2	0.0146567	4.59581	4.31e-06	0.000158825
ENSG00000148925	BTB domain containing 10	BTBD10	-0.00956076	-4.59509	4.33e-06	0.000159152
ENSG00000162373	BEN domain containing 5	BEND5	-0.0104214	-4.59434	4.34e-06	0.000159506
ENSG00000142973	cytochrome P450 family 4 subfamily B member 1	CYP4B1	0.0316412	4.59323	4.36e-06	0.000160139
ENSG00000261126	RBFA downstream neighbor (non-protein coding)	RP11-795F19.1	0.0167673	4.59208	4.39e-06	0.000160805
ENSG00000155096	antizyme inhibitor 1	AZIN1	-0.00915877	-4.59039	4.42e-06	0.000161895
ENSG00000239828		RP11-446H18.5	0.0136139	4.58793	4.48e-06	0.000163585
ENSG00000140577	CREB regulated transcription coactivator 3	CRTC3	0.00941477	4.58667	4.5e-06	0.000164135
ENSG00000139405	RBPJ interacting and tubulin associated 1	RITA1	-0.00814253	-4.58694	4.5e-06	0.000164135
ENSG00000118557	polyamine modulated factor 1 binding protein 1	PMFBP1	0.0170144	4.58632	4.51e-06	0.000164186
ENSG00000173915	up-regulated during skeletal muscle growth 5 homolog (mouse)	USMG5	-0.0145151	-4.58534	4.53e-06	0.000164732
ENSG00000198315	zinc finger with KRAB and SCAN domains 8	ZKSCAN8	0.00720916	4.58096	4.63e-06	0.000167991
ENSG00000146540	chromosome 7 open reading frame 50	C7orf50	-0.00978266	-4.58046	4.64e-06	0.000168172
ENSG00000177879	adaptor related protein complex 3 sigma 1 subunit	AP3S1	-0.0073595	-4.57957	4.66e-06	0.000168661
ENSG00000112159	midasin AAA ATPase 1	MDN1	0.00557195	4.57762	4.7e-06	0.000169863
ENSG00000095383	TBC1 domain family member 2	TBC1D2	0.012309	4.57725	4.71e-06	0.000169863
ENSG00000158220	extended synaptotagmin 3	ESYT3	0.00906009	4.57724	4.71e-06	0.000169863
ENSG00000182768	neugrin, neurite outgrowth associated	NGRN	-0.00916491	-4.57693	4.72e-06	0.000169885
ENSG00000133107	transient receptor potential cation channel subfamily C member 4	TRPC4	-0.00621531	-4.57649	4.73e-06	0.000170013
ENSG00000140443	insulin like growth factor 1 receptor	IGF1R	0.00993011	4.57422	4.78e-06	0.000171615
ENSG00000111783	regulatory factor X4	RFX4	0.0117928	4.57397	4.79e-06	0.000171615
ENSG00000147457	charged multivesicular body protein 7	CHMP7	-0.00564415	-4.57288	4.81e-06	0.000172278
ENSG00000168243	G protein subunit gamma 4	GNG4	-0.00697858	-4.57152	4.84e-06	0.000173167
ENSG00000182050	MGAT4 family member C	MGAT4C	-0.00857185	-4.56864	4.91e-06	0.000175335
ENSG00000105894	pleiotrophin	PTN	-0.0101504	-4.5678	4.93e-06	0.000175805
ENSG00000168811	interleukin 12A	IL12A	0.0132371	4.56673	4.95e-06	0.000176471
ENSG00000168843	follistatin like 5	FSTL5	-0.0130689	-4.56641	4.96e-06	0.0001765
ENSG00000168675	low density lipoprotein receptor class A domain containing 4	LDLRAD4	-0.00576666	-4.56609	4.97e-06	0.00017654
ENSG00000148572	nuclear receptor binding factor 2	NRBF2	-0.00875028	-4.56534	4.99e-06	0.000176941
ENSG00000186047	deleted in lymphocytic leukemia, 7	DLEU7	-0.0093412	-4.56337	5.03e-06	0.000178373
ENSG00000224431		AC063976.7	0.0188254	4.5619	5.07e-06	0.000179389
ENSG00000127445	peptidylprolyl cis/trans isomerase, NIMA-interacting 1	PIN1	-0.0119139	-4.5613	5.08e-06	0.000179669
ENSG00000174132	family with sequence similarity 174 member A	FAM174A	-0.0127131	-4.56015	5.11e-06	0.000180178
ENSG00000182575	neurexophilin 3	NXPH3	-0.00934937	-4.56027	5.11e-06	0.000180178
ENSG00000166523	C-type lectin domain family 4 member E	CLEC4E	0.0353431	4.55897	5.14e-06	0.000180959
ENSG00000085978	autophagy related 16 like 1	ATG16L1	-0.00654768	-4.55818	5.16e-06	0.000181398
ENSG00000072163	LIM zinc finger domain containing 2	LIMS2	-0.0146788	-4.5572	5.18e-06	0.000182013
ENSG00000224318	CHL1 antisense RNA 2	CHL1-AS2	-0.0139609	-4.55641	5.2e-06	0.000182459
ENSG00000135801	TATA-box binding protein associated factor 5 like	TAF5L	-0.00472405	-4.55608	5.21e-06	0.000182506
ENSG00000105519	calcyphosine	CAPS	0.0113097	4.55343	5.28e-06	0.000184582
ENSG00000100804	proteasome subunit beta 5	PSMB5	-0.0115662	-4.55	5.36e-06	0.000187129
ENSG00000140575	IQ motif containing GTPase activating protein 1	IQGAP1	0.0107311	4.54875	5.4e-06	0.000187996
ENSG00000174109	chromosome 16 open reading frame 91	C16orf91	-0.013583	-4.54781	5.42e-06	0.000188598
ENSG00000135919	serpin family E member 2	SERPINE2	-0.00619079	-4.54462	5.5e-06	0.000191228
ENSG00000216863	LY86 antisense RNA 1	LY86-AS1	-0.0102388	-4.54386	5.52e-06	0.000191672
ENSG00000160183	transmembrane protease, serine 3	TMPRSS3	0.0206165	4.54332	5.54e-06	0.000191773
ENSG00000106351	ArfGAP with FG repeats 2	AGFG2	0.0088976	4.5432	5.54e-06	0.000191773
ENSG00000165724	zinc finger MYND-type containing 19	ZMYND19	-0.00813515	-4.5428	5.55e-06	0.000191889
ENSG00000102003	synaptophysin	SYP	-0.0154928	-4.53678	5.71e-06	0.000197191
ENSG00000114956	deoxyguanosine kinase	DGUOK	-0.00844359	-4.53481	5.77e-06	0.000198792
ENSG00000088340	fer-1 like family member 4, pseudogene	FER1L4	0.014853	4.53439	5.78e-06	0.000198863
ENSG00000158714	SLAM family member 8	SLAMF8	0.0205003	4.53419	5.78e-06	0.000198863
ENSG00000206535	leukemia NUP98 fusion partner 1	LNP1	-0.011608	-4.53088	5.87e-06	0.000201742
ENSG00000053372	MRT4 homolog, ribosome maturation factor	MRTO4	-0.0087256	-4.52691	5.99e-06	0.000205309
ENSG00000229688	ISPD antisense RNA 1	ISPD-AS1	0.0164935	4.52482	6.04e-06	0.000207085
ENSG00000198890	protein arginine methyltransferase 6	PRMT6	-0.00737596	-4.52339	6.09e-06	0.000208225
ENSG00000164949	GTP binding protein overexpressed in skeletal muscle	GEM	0.0160661	4.5216	6.14e-06	0.000209729
ENSG00000141570	chromobox 8	CBX8	-0.00919297	-4.52102	6.15e-06	0.00021003
ENSG00000250608	uncharacterized LOC339874	RP11-933H2.4	0.0194325	4.52021	6.18e-06	0.000210575
ENSG00000226695	ankyrin repeat domain 20 family member A10, pseudogene	ANKRD20A10P	-0.018103	-4.51907	6.21e-06	0.000211437
ENSG00000178971	CST telomere replication complex component 1	CTC1	0.00838636	4.51862	6.22e-06	0.000211624
ENSG00000064300	nerve growth factor receptor	NGFR	0.028116	4.51706	6.27e-06	0.000212916
ENSG00000171612	solute carrier family 25 member 33	SLC25A33	-0.00932517	-4.51434	6.35e-06	0.000215127
ENSG00000161981	small nuclear ribonucleoprotein U11/U12 subunit 25	SNRNP25	-0.0107575	-4.51059	6.46e-06	0.000218491
ENSG00000005194	cytokine induced apoptosis inhibitor 1	CIAPIN1	-0.00914347	-4.51051	6.47e-06	0.000218491
ENSG00000261572		RP11-384L8.1	-0.0130545	-4.50863	6.52e-06	0.000220159
ENSG00000151743	antagonist of mitotic exit network 1 homolog	AMN1	-0.00960004	-4.50726	6.57e-06	0.000221314
ENSG00000137038	distal membrane arm assembly complex 1	TMEM261	-0.00843179	-4.50484	6.64e-06	0.000223567
ENSG00000184258	cerebellar degeneration related protein 1	CDR1	0.0231657	4.5024	6.72e-06	0.000225584
ENSG00000183726	transmembrane protein 50A	TMEM50A	-0.00609288	-4.50194	6.73e-06	0.000225792
ENSG00000256576	long intergenic non-protein coding RNA 2361	RP13-977J11.2	-0.0156657	-4.5014	6.75e-06	0.000226079
ENSG00000248587	GDNF antisense RNA 1 (head to head)	GDNF-AS1	0.0173852	4.50031	6.79e-06	0.000226959
ENSG00000119699	transforming growth factor beta 3	TGFB3	0.0108786	4.49884	6.83e-06	0.000228254
ENSG00000124920	myelin regulatory factor	MYRF	0.0176245	4.4949	6.96e-06	0.000232227
ENSG00000186732	metallophosphoesterase domain containing 1	MPPED1	-0.00878712	-4.49431	6.98e-06	0.000232589
ENSG00000248208	WD repeat domain 45 pseudogene 1	RP11-153M7.1	0.0307177	4.49401	6.99e-06	0.000232627
ENSG00000134375	translocase of inner mitochondrial membrane 17A	TIMM17A	-0.0125674	-4.49315	7.02e-06	0.000233277
ENSG00000263327	TAPT1 antisense RNA 1 (head to head)	TAPT1-AS1	0.00698274	4.49058	7.1e-06	0.000235527
ENSG00000137869	cytochrome P450 family 19 subfamily A member 1	CYP19A1	0.0395666	4.48944	7.14e-06	0.000236495
ENSG00000154188	angiopoietin 1	ANGPT1	0.0120508	4.48871	7.17e-06	0.000237015
ENSG00000165626	BEN domain containing 7	BEND7	0.00993389	4.48827	7.18e-06	0.000237068
ENSG00000116885	organic solute carrier partner 1	OSCP1	-0.00934761	-4.48814	7.18e-06	0.000237068
ENSG00000150510	family with sequence similarity 124 member A	FAM124A	0.0117442	4.48702	7.22e-06	0.000238024
ENSG00000174498	immunoglobulin superfamily DCC subclass member 3	IGDCC3	0.011862	4.48561	7.27e-06	0.000239309
ENSG00000070831	cell division cycle 42	CDC42	-0.00926229	-4.48506	7.29e-06	0.000239633
ENSG00000187601	MAGE family member H1	MAGEH1	-0.0118235	-4.48247	7.38e-06	0.000242269
ENSG00000184702	septin 5	2018-09-05	-0.00901276	-4.48097	7.43e-06	0.000243386
ENSG00000124523	sirtuin 5	SIRT5	-0.00557845	-4.48105	7.43e-06	0.000243386
ENSG00000244378	ribosomal protein S2 pseudogene 45	RPS2P45	0.0191164	4.4804	7.45e-06	0.000243732
ENSG00000103415	heme oxygenase 2	HMOX2	-0.0106075	-4.47724	7.56e-06	0.000247068
ENSG00000159128	interferon gamma receptor 2	IFNGR2	-0.00630016	-4.47678	7.58e-06	0.000247304
ENSG00000184867	armadillo repeat containing, X-linked 2	ARMCX2	-0.00589364	-4.47553	7.62e-06	0.000248447
ENSG00000184371	colony stimulating factor 1	CSF1	0.0160149	4.47451	7.66e-06	0.000249337
ENSG00000180185	fumarylacetoacetate hydrolase domain containing 1	FAHD1	-0.00946515	-4.47416	7.67e-06	0.000249442
ENSG00000137825	inositol-trisphosphate 3-kinase A	ITPKA	-0.0128317	-4.47349	7.7e-06	0.000249922
ENSG00000197892	kinesin family member 13B	KIF13B	0.00895878	4.47229	7.74e-06	0.000251027
ENSG00000164484	transmembrane protein 200A	TMEM200A	-0.0117329	-4.47136	7.77e-06	0.000251816
ENSG00000078369	G protein subunit beta 1	GNB1	-0.00523365	-4.4694	7.84e-06	0.000253834
ENSG00000112706	interphotoreceptor matrix proteoglycan 1	IMPG1	-0.0111275	-4.469	7.86e-06	0.000253996
ENSG00000127362	taste 2 receptor member 3	TAS2R3	0.0134443	4.45894	8.24e-06	0.0002659
ENSG00000102743	solute carrier family 25 member 15	SLC25A15	-0.00781342	-4.45868	8.25e-06	0.000265902
ENSG00000163531	neurofascin	NFASC	0.0122023	4.45692	8.31e-06	0.000267776
ENSG00000184863	RNA binding motif protein 33	RBM33	0.00672353	4.45519	8.38e-06	0.000269615
ENSG00000254901	BLOC-1 related complex subunit 8	BORCS8	-0.0115185	-4.45469	8.4e-06	0.000269926
ENSG00000226816		AC005082.12	-0.0159073	-4.44951	8.61e-06	0.00027619
ENSG00000176945	mucin 20, cell surface associated	MUC20	0.0211797	4.44856	8.64e-06	0.000277078
ENSG00000099341	proteasome 26S subunit, non-ATPase 8	PSMD8	-0.0112875	-4.44803	8.67e-06	0.00027743
ENSG00000257057	chromosome 11 open reading frame 97	C11orf97	-0.0188279	-4.44735	8.69e-06	0.000277976
ENSG00000152684	pelota mRNA surveillance and ribosome rescue factor	PELO	-0.00513365	-4.44586	8.75e-06	0.000279478
ENSG00000232712	KIZ antisense RNA 1	KIZ-AS1	0.0163725	4.44548	8.77e-06	0.000279478
ENSG00000197375	solute carrier family 22 member 5	SLC22A5	0.00886497	4.44517	8.78e-06	0.000279478
ENSG00000153012	leucine rich repeat LGI family member 2	LGI2	-0.0106738	-4.44512	8.78e-06	0.000279478
ENSG00000136247	zinc finger DHHC-type containing 4	ZDHHC4	-0.00708262	-4.44492	8.79e-06	0.000279478
ENSG00000115685	protein phosphatase 1 regulatory subunit 7	PPP1R7	-0.00859612	-4.44267	8.88e-06	0.000281743
ENSG00000162728	potassium voltage-gated channel subfamily J member 9	KCNJ9	-0.00828315	-4.44279	8.88e-06	0.000281743
ENSG00000104687	glutathione-disulfide reductase	GSR	-0.00667989	-4.44239	8.9e-06	0.000281778
ENSG00000100478	adaptor related protein complex 4 sigma 1 subunit	AP4S1	-0.00849818	-4.44187	8.92e-06	0.000282129
ENSG00000182870	polypeptide N-acetylgalactosaminyltransferase 9	GALNT9	-0.00924858	-4.44026	8.99e-06	0.000283921
ENSG00000127507	adhesion G protein-coupled receptor E2	ADGRE2	0.020043	4.43997	9e-06	0.000283967
ENSG00000116237	isoprenylcysteine carboxyl methyltransferase	ICMT	-0.00566868	-4.43935	9.02e-06	0.000284453
ENSG00000119514	polypeptide N-acetylgalactosaminyltransferase 12	GALNT12	0.010147	4.43841	9.06e-06	0.000285365
ENSG00000127366	taste 2 receptor member 5	TAS2R5	0.0127612	4.43705	9.12e-06	0.000286827
ENSG00000259295	chondroitin sulfate proteoglycan 4 pseudogene	CSPG4P12	0.0124299	4.43604	9.16e-06	0.00028784
ENSG00000249992	transmembrane protein 158 (gene/pseudogene)	TMEM158	-0.0106974	-4.43384	9.26e-06	0.000290459
ENSG00000162704	actin related protein 2/3 complex subunit 5	ARPC5	-0.00869949	-4.43042	9.4e-06	0.000294752
ENSG00000143155	TOR signaling pathway regulator	TIPRL	-0.00986554	-4.42946	9.45e-06	0.000295723
ENSG00000162069	BICD family like cargo adaptor 2	BICDL2	-0.0165669	-4.42856	9.49e-06	0.000296622
ENSG00000170786	short chain dehydrogenase/reductase family 16C member 5	SDR16C5	-0.0133997	-4.42702	9.55e-06	0.000298353
ENSG00000166402	tubby bipartite transcription factor	TUB	-0.00590494	-4.42676	9.57e-06	0.000298353
ENSG00000163516	ankyrin repeat and zinc finger domain containing 1	ANKZF1	0.0060859	4.42655	9.58e-06	0.000298353
ENSG00000070778	protein tyrosine phosphatase, non-receptor type 21	PTPN21	0.00728526	4.42321	9.72e-06	0.00030266
ENSG00000171509	relaxin/insulin like family peptide receptor 1	RXFP1	-0.0127433	-4.42281	9.74e-06	0.000302862
ENSG00000229808		RP11-456P18.2	0.0153258	4.42224	9.77e-06	0.000303318
ENSG00000004059	ADP ribosylation factor 5	ARF5	-0.010028	-4.41972	9.88e-06	0.000306518
ENSG00000014824	solute carrier family 30 member 9	SLC30A9	-0.0101827	-4.41708	1e-05	0.000309932
ENSG00000140104	clathrin binding box of aftiphilin containing 1	C14orf79	-0.00805146	-4.41483	1.01e-05	0.000312812
ENSG00000133321	retinoic acid receptor responder 3	RARRES3	0.0166788	4.41251	1.02e-05	0.000315095
ENSG00000144230	G protein-coupled receptor 17	GPR17	-0.0175656	-4.41185	1.02e-05	0.000315686
ENSG00000205704	long intergenic non-protein coding RNA 634	LINC00634	-0.0117907	-4.41271	1.02e-05	0.000315095
ENSG00000175785	proline rich membrane anchor 1	PRIMA1	0.021727	4.41096	1.03e-05	0.000316257
ENSG00000150051	mohawk homeobox	MKX	-0.0102246	-4.41026	1.03e-05	0.000316932
ENSG00000118680	myosin light chain 12B	MYL12B	-0.0090755	-4.41117	1.03e-05	0.000316257
ENSG00000166896	ATP23 metallopeptidase and ATP synthase assembly factor homolog	ATP23	-0.00975751	-4.40911	1.04e-05	0.000318245
ENSG00000176273	solute carrier family 35 member G1	SLC35G1	-0.00909696	-4.40704	1.05e-05	0.000320937
ENSG00000130948	hydroxysteroid 17-beta dehydrogenase 3	HSD17B3	0.0187768	4.40495	1.06e-05	0.000323684
ENSG00000138190	exocyst complex component 6	EXOC6	-0.00784202	-4.40193	1.07e-05	0.000327851
ENSG00000005893	lysosomal associated membrane protein 2	LAMP2	0.00984557	4.40126	1.08e-05	0.000328112
ENSG00000088832	FK506 binding protein 1A	FKBP1A	-0.0067074	-4.4013	1.08e-05	0.000328112
ENSG00000103044	hyaluronan synthase 3	HAS3	0.0136509	4.39939	1.09e-05	0.000330519
ENSG00000198625	MDM4, p53 regulator	MDM4	0.00746428	4.39821	1.09e-05	0.000331247
ENSG00000213672	NCK interacting protein with SH3 domain	NCKIPSD	0.0099405	4.39766	1.09e-05	0.000331346
ENSG00000150625	glycoprotein M6A	GPM6A	-0.00978053	-4.3988	1.09e-05	0.000330722
ENSG00000184983	NADH:ubiquinone oxidoreductase subunit A6	NDUFA6	-0.00949213	-4.39918	1.09e-05	0.000330519
ENSG00000159450	trichohyalin	TCHH	0.0143835	4.39572	1.1e-05	0.000333184
ENSG00000160963	collagen type XXVI alpha 1 chain	COL26A1	-0.00925425	-4.39591	1.1e-05	0.000333184
ENSG00000004961	holocytochrome c synthase	HCCS	-0.00818191	-4.39686	1.1e-05	0.000332197
ENSG00000149289	zinc finger CCCH-type containing 12C	ZC3H12C	0.0069022	4.39447	1.11e-05	0.000334732
ENSG00000254154		RP4-798P15.3	0.0109746	4.39054	1.13e-05	0.000340458
ENSG00000180525	proline rich 26	PRR26	0.0165431	4.38926	1.14e-05	0.000341219
ENSG00000168229	prostaglandin D2 receptor	PTGDR	0.0195418	4.38894	1.14e-05	0.000341219
ENSG00000149489	retinal outer segment membrane protein 1	ROM1	0.011995	4.38789	1.14e-05	0.000342199
ENSG00000183090	FRAS1 related extracellular matrix 3	FREM3	-0.0168358	-4.38891	1.14e-05	0.000341219
ENSG00000156170	NADH:ubiquinone oxidoreductase complex assembly factor 6	NDUFAF6	-0.00726173	-4.3895	1.14e-05	0.000341219
ENSG00000196547	mannosidase alpha class 2A member 2	MAN2A2	0.00786508	4.38773	1.15e-05	0.000342199
ENSG00000158169	Fanconi anemia complementation group C	FANCC	0.0106176	4.38709	1.15e-05	0.000342521
ENSG00000236296	glucuronidase, beta pseudogene 5	GUSBP5	-0.00938891	-4.38705	1.15e-05	0.000342521
ENSG00000143933	calmodulin 1	CALM2	-0.0110884	-4.38231	1.17e-05	0.000349665
ENSG00000009844	vesicle trafficking 1	VTA1	-0.0079887	-4.38186	1.18e-05	0.000350008
ENSG00000163923	ribosomal protein L39 like	RPL39L	-0.0135492	-4.3799	1.19e-05	0.000352769
ENSG00000263177	mitochondrially encoded NADH:ubiquinone oxidoreductase core subunit 1 pseudogene 8	MTND1P8	0.0229584	4.37693	1.2e-05	0.000356822
ENSG00000154162	cadherin 12	CDH12	-0.00871594	-4.37838	1.2e-05	0.000354848
ENSG00000180611	Mab-21 domain containing 2	MB21D2	-0.0105484	-4.37572	1.21e-05	0.000358411
ENSG00000253457	small integral membrane protein 18	SMIM18	-0.0141821	-4.37204	1.23e-05	0.000364109
ENSG00000250189		RP11-362F19.2	0.0275954	4.3698	1.24e-05	0.000367451
ENSG00000125445	mitochondrial ribosomal protein S7	MRPS7	-0.0095948	-4.36888	1.25e-05	0.000368192
ENSG00000134207	synaptotagmin 6	SYT6	-0.00880783	-4.36927	1.25e-05	0.000367946
ENSG00000214114	MYC binding protein	MYCBP	0.010192	4.36649	1.26e-05	0.000371236
ENSG00000100379	potassium channel tetramerization domain containing 17	KCTD17	-0.00878847	-4.36637	1.26e-05	0.000371236
ENSG00000165973	neural EGFL like 1	NELL1	-0.0113863	-4.36694	1.26e-05	0.000371076
ENSG00000214262	ankyrin repeat domain 36B pseudogene 1	ANKRD36BP1	0.0120903	4.36527	1.27e-05	0.0003727
ENSG00000224831		RP11-651P23.4	-0.0131173	-4.36441	1.27e-05	0.000373749
ENSG00000143727	acid phosphatase 1	ACP1	-0.00896147	-4.36206	1.29e-05	0.000376974
ENSG00000187260	WD repeat domain 86	WDR86	-0.0122152	-4.36225	1.29e-05	0.000376974
ENSG00000196950	solute carrier family 39 member 10	SLC39A10	-0.0117979	-4.36021	1.3e-05	0.000379768
ENSG00000242428	C3orf67 antisense RNA 1	C3orf67-AS1	-0.0123254	-4.35452	1.33e-05	0.000389341
ENSG00000231697	Nanog homeobox pseudogene 5	NANOGP5	0.0200451	4.35346	1.34e-05	0.000390807
ENSG00000205363	chromosome 15 open reading frame 59	C15orf59	-0.00916692	-4.35234	1.35e-05	0.000392378
ENSG00000122367	LIM domain binding 3	LDB3	0.0143291	4.35026	1.36e-05	0.000395688
ENSG00000231768	long intergenic non-protein coding RNA 1354	LINC01354	0.0139679	4.34974	1.36e-05	0.000396197
ENSG00000214457	ribosomal protein L7 pseudogene 29	RPL7P29	0.0179685	4.34874	1.37e-05	0.000396476
ENSG00000162909	calpain 2	CAPN2	0.0058397	4.34844	1.37e-05	0.000396476
ENSG00000130511	single stranded DNA binding protein 4	SSBP4	-0.0112643	-4.3484	1.37e-05	0.000396476
ENSG00000136930	proteasome subunit beta 7	PSMB7	-0.00820863	-4.34915	1.37e-05	0.000396402
ENSG00000269210	uncharacterized LOC375196	RP11-173C1.1	-0.0161359	-4.3494	1.37e-05	0.000396379
ENSG00000166762	cation channel sperm associated 2	CATSPER2	0.0131645	4.34589	1.39e-05	0.000400606
ENSG00000138435	cholinergic receptor nicotinic alpha 1 subunit	CHRNA1	0.0175808	4.34559	1.39e-05	0.000400721
ENSG00000177426	TGFB induced factor homeobox 1	TGIF1	0.0129784	4.345	1.39e-05	0.00040137
ENSG00000169884	Wnt family member 10B	WNT10B	-0.0100234	-4.34314	1.4e-05	0.000403059
ENSG00000213753	CENPB DNA-binding domains containing 1 pseudogene 1	CENPBD1P1	-0.00565385	-4.34355	1.4e-05	0.000402728
ENSG00000165637	voltage dependent anion channel 2	VDAC2	-0.00762902	-4.34434	1.4e-05	0.000401729
ENSG00000100216	translocase of outer mitochondrial membrane 22	TOMM22	-0.0117244	-4.34438	1.4e-05	0.000401729
ENSG00000144231	RNA polymerase II subunit D	POLR2D	-0.00483596	-4.34188	1.41e-05	0.000404945
ENSG00000129990	synaptotagmin 5	SYT5	-0.0100753	-4.34076	1.42e-05	0.000405714
ENSG00000205138	succinate dehydrogenase complex assembly factor 1	SDHAF1	-0.0115188	-4.34114	1.42e-05	0.000405455
ENSG00000102572	serine/threonine kinase 24	STK24	-0.00553018	-4.34148	1.42e-05	0.000405247
ENSG00000182566	C-type lectin domain family 4 member G	CLEC4G	-0.0159727	-4.33909	1.43e-05	0.000407936
ENSG00000133424	LARGE xylosyl- and glucuronyltransferase 1	LARGE1	-0.00645985	-4.33959	1.43e-05	0.000407452
ENSG00000119403	PHD finger protein 19	PHF19	0.00982019	4.33682	1.45e-05	0.00041136
ENSG00000206418	RAB12, member RAS oncogene family	RAB12	-0.00942932	-4.33679	1.45e-05	0.00041136
ENSG00000101040	zinc finger MYND-type containing 8	ZMYND8	0.00719564	4.33472	1.46e-05	0.000414807
ENSG00000117410	ATPase H+ transporting V0 subunit b	ATP6V0B	-0.0124065	-4.3344	1.46e-05	0.000414967
ENSG00000153094	BCL2 like 11	BCL2L11	0.00850216	4.33265	1.47e-05	0.000416082
ENSG00000131508	ubiquitin conjugating enzyme E2 D2	UBE2D2	-0.00625615	-4.33242	1.47e-05	0.000416088
ENSG00000183665	tRNA methyltransferase 12 homolog	TRMT12	-0.00657042	-4.33313	1.47e-05	0.000415626
ENSG00000165092	aldehyde dehydrogenase 1 family member A1	ALDH1A1	-0.0111267	-4.33337	1.47e-05	0.000415595
ENSG00000105393	BRISC and BRCA1 A complex member 1	BABAM1	-0.00931916	-4.33388	1.47e-05	0.000415081
ENSG00000183648	NADH:ubiquinone oxidoreductase subunit B1	NDUFB1	-0.0133079	-4.33388	1.47e-05	0.000415081
ENSG00000243147	mitochondrial ribosomal protein L33	MRPL33	-0.0130563	-4.32999	1.49e-05	0.000419813
ENSG00000133606	makorin ring finger protein 1	MKRN1	-0.00786069	-4.33062	1.49e-05	0.000419063
ENSG00000250072	SH3TC2 divergent transcript	CTC-529P8.1	0.0182248	4.32941	1.5e-05	0.000420497
ENSG00000116459	ATP synthase, H+ transporting, mitochondrial Fo complex subunit B1	ATP5F1	-0.00909956	-4.3239	1.53e-05	0.000429329
ENSG00000141428	chromosome 18 open reading frame 21	C18orf21	-0.0064456	-4.32484	1.53e-05	0.000427958
ENSG00000161956	SUMO1/sentrin/SMT3 specific peptidase 3	SENP3	-0.00789909	-4.32235	1.54e-05	0.000431466
ENSG00000138944	KIAA1644	KIAA1644	-0.00754868	-4.32358	1.54e-05	0.000429505
ENSG00000145912	NHP2 ribonucleoprotein	NHP2	-0.0111449	-4.32149	1.55e-05	0.000432244
ENSG00000116455	WD repeat domain 77	WDR77	-0.0044207	-4.32178	1.55e-05	0.000432141
ENSG00000171790	schlafen like 1	SLFNL1	0.0169919	4.3202	1.56e-05	0.000434327
ENSG00000173114	leucine rich repeat neuronal 3	LRRN3	-0.00880859	-4.31988	1.56e-05	0.000434517
ENSG00000260439	LMF1 antisense RNA 1	LMF1-AS1	0.0159731	4.31874	1.57e-05	0.000436316
ENSG00000105197	translocase of inner mitochondrial membrane 50	TIMM50	-0.00614818	-4.31794	1.57e-05	0.000437215
ENSG00000267206	lipocalin 6	LCN6	0.0342332	4.31704	1.58e-05	0.000437868
ENSG00000166669	activating transcription factor 7 interacting protein 2	ATF7IP2	-0.00711447	-4.31662	1.58e-05	0.000438067
ENSG00000185008	roundabout guidance receptor 2	ROBO2	-0.00979825	-4.3176	1.58e-05	0.000437215
ENSG00000106682	eukaryotic translation initiation factor 4H	EIF4H	-0.00767225	-4.31764	1.58e-05	0.000437215
ENSG00000077616	N-acetylated alpha-linked acidic dipeptidase 2	NAALAD2	0.00956162	4.31543	1.59e-05	0.000439723
ENSG00000197360	zinc finger protein 492	ZNF98	-0.0118149	-4.31649	1.59e-05	0.000438067
ENSG00000157778	proteasome assembly chaperone 3	PSMG3	-0.012045	-4.31501	1.6e-05	0.000440103
ENSG00000087995	methyltransferase like 2A	METTL2A	-0.00534303	-4.3131	1.61e-05	0.000443464
ENSG00000180370	p21 (RAC1) activated kinase 2	PAK2	0.00682375	4.31168	1.62e-05	0.000445866
ENSG00000224310	long intergenic non-protein coding RNA 1567	LINC01567	0.0169667	4.31107	1.62e-05	0.000446189
ENSG00000136718	IMP4, U3 small nucleolar ribonucleoprotein	IMP4	-0.00663812	-4.31117	1.62e-05	0.000446189
ENSG00000248150	long intergenic non-protein coding RNA 2150	RP1-167G20.1	0.020637	4.30897	1.64e-05	0.000449984
ENSG00000172771	EF-hand calcium binding domain 12	EFCAB12	0.0180852	4.30792	1.65e-05	0.000450558
ENSG00000164161	hedgehog interacting protein	HHIP	0.0137446	4.30778	1.65e-05	0.000450558
ENSG00000124134	potassium voltage-gated channel modifier subfamily S member 1	KCNS1	0.0122637	4.30775	1.65e-05	0.000450558
ENSG00000163170	bolA family member 3	BOLA3	-0.00949331	-4.30756	1.65e-05	0.000450558
ENSG00000047621	chromosome 12 open reading frame 4	C12orf4	-0.00739164	-4.30802	1.65e-05	0.000450558
ENSG00000197872	family with sequence similarity 49 member A	FAM49A	-0.00929046	-4.30617	1.66e-05	0.00045248
ENSG00000229618		AC011288.2	-0.0126779	-4.30618	1.66e-05	0.00045248
ENSG00000156463	SH3 domain containing ring finger 2	SH3RF2	0.0129231	4.3055	1.67e-05	0.000453381
ENSG00000119729	ras homolog family member Q	RHOQ	0.00696063	4.30517	1.67e-05	0.000453613
ENSG00000247596	twinfilin actin binding protein 2	TWF2	-0.010432	-4.30481	1.67e-05	0.000453884
ENSG00000234690	uncharacterized LOC101927043	AC073283.4	0.0189692	4.30374	1.68e-05	0.000455617
ENSG00000118058	lysine methyltransferase 2A	KMT2A	0.0101599	4.30318	1.68e-05	0.000456308
ENSG00000189181	olfactory receptor family 14 subfamily I member 1	OR14I1	-0.0119183	-4.30219	1.69e-05	0.000457894
ENSG00000115457	insulin like growth factor binding protein 2	IGFBP2	-0.0128654	-4.30159	1.7e-05	0.000458677
ENSG00000167754	kallikrein related peptidase 5	KLK5	-0.0194326	-4.29923	1.71e-05	0.000462649
ENSG00000213619	NADH:ubiquinone oxidoreductase core subunit S3	NDUFS3	-0.00846601	-4.29944	1.71e-05	0.000462649
ENSG00000125037	ER membrane protein complex subunit 3	EMC3	-0.00786731	-4.29796	1.72e-05	0.000463919
ENSG00000099977	D-dopachrome tautomerase	DDT	-0.0106309	-4.29831	1.72e-05	0.00046364
ENSG00000226055	phosphoribosylaminoimidazole carboxylase, phosphoribosylaminoimidazole succinocarboxamide synthetase pseudogene 1	PAICSP1	0.0134673	4.29748	1.73e-05	0.00046446
ENSG00000009694	teneurin transmembrane protein 1	TENM1	-0.00710141	-4.29593	1.74e-05	0.000467248
ENSG00000119537	3-ketodihydrosphingosine reductase	KDSR	0.00589742	4.29524	1.75e-05	0.00046823
ENSG00000093167	LRR binding FLII interacting protein 2	LRRFIP2	0.00509255	4.29436	1.75e-05	0.000469615
ENSG00000128266	G protein subunit alpha z	GNAZ	-0.00506096	-4.29414	1.75e-05	0.00046963
ENSG00000177119	anoctamin 6	ANO6	0.0093718	4.29303	1.76e-05	0.000470961
ENSG00000160014	calmodulin 1	CALM3	-0.00976337	-4.29285	1.76e-05	0.000470961
ENSG00000138604	glucuronic acid epimerase	GLCE	-0.00890111	-4.29311	1.76e-05	0.000470961
ENSG00000112146	F-box protein 9	FBXO9	-0.00679209	-4.29231	1.77e-05	0.000471163
ENSG00000089123	taspase 1	TASP1	-0.0070599	-4.29261	1.77e-05	0.000470984
ENSG00000128626	mitochondrial ribosomal protein S12	MRPS12	-0.0108822	-4.29036	1.78e-05	0.000474845
ENSG00000117118	succinate dehydrogenase complex iron sulfur subunit B	SDHB	-0.00892697	-4.28964	1.79e-05	0.000475918
ENSG00000134533	RAS like estrogen regulated growth inhibitor	RERG	-0.0105518	-4.28824	1.8e-05	0.000478459
ENSG00000122566	heterogeneous nuclear ribonucleoprotein A2/B1	HNRNPA2B1	0.00750048	4.28755	1.81e-05	0.00047946
ENSG00000248738	uncharacterized LOC101929237	RP11-87E22.2	-0.0155342	-4.28197	1.85e-05	0.000490015
ENSG00000081721	dual specificity phosphatase 12	DUSP12	-0.00780332	-4.28202	1.85e-05	0.000490015
ENSG00000006007	glycerophosphodiester phosphodiesterase 1	GDE1	-0.00623317	-4.2821	1.85e-05	0.000490015
ENSG00000249478		CTB-49A3.5	0.0209084	4.28138	1.86e-05	0.000490015
ENSG00000213088	atypical chemokine receptor 1 (Duffy blood group)	ACKR1	0.0206875	4.28119	1.86e-05	0.000490015
ENSG00000267733		RP11-64C12.3	0.0208585	4.28106	1.86e-05	0.000490015
ENSG00000123352	spermatogenesis associated serine rich 2	SPATS2	-0.00550512	-4.28096	1.86e-05	0.000490015
ENSG00000262267		U95743.1	-0.0174705	-4.28123	1.86e-05	0.000490015
ENSG00000090447	transcription factor AP-4	TFAP4	0.00839645	4.27992	1.87e-05	0.000491109
ENSG00000183562		CTC-343N3.1	0.0103787	4.27981	1.87e-05	0.000491109
ENSG00000236714	long intergenic non-protein coding RNA 1844	AC005592.1	-0.0179602	-4.27959	1.87e-05	0.000491121
ENSG00000135972	mitochondrial ribosomal protein S9	MRPS9	-0.00840153	-4.28045	1.87e-05	0.000490653
ENSG00000173621	leucine rich repeat and fibronectin type III domain containing 4	LRFN4	-0.00926285	-4.27871	1.88e-05	0.000492572
ENSG00000151366	NADH:ubiquinone oxidoreductase subunit C2	NDUFC2	-0.0106696	-4.27787	1.89e-05	0.00049395
ENSG00000081138	cadherin 7	CDH7	-0.00812206	-4.27652	1.9e-05	0.000496488
ENSG00000268894	PLCE1 antisense RNA 1	PLCE1-AS1	0.0192588	4.27475	1.91e-05	0.000499859
ENSG00000175137	SH3 binding domain protein 5 like	SH3BP5L	-0.008429	-4.27409	1.92e-05	0.000500466
ENSG00000134602	serine/threonine kinase 26	STK26	-0.0107105	-4.27458	1.92e-05	0.000499859
ENSG00000064726	BTB domain containing 1	BTBD1	-0.00861492	-4.27293	1.93e-05	0.000502095
ENSG00000183036	Purkinje cell protein 4	PCP4	-0.0139037	-4.27339	1.93e-05	0.000501547
ENSG00000186184	RNA polymerase I subunit D	POLR1D	-0.0045134	-4.27047	1.95e-05	0.000506683
ENSG00000263874	long intergenic non-protein coding RNA 672	LINC00672	-0.0109925	-4.27093	1.95e-05	0.000506137
ENSG00000171105	insulin receptor	INSR	0.00485386	4.26987	1.96e-05	0.000507569
ENSG00000029153	aryl hydrocarbon receptor nuclear translocator like 2	ARNTL2	-0.00672067	-4.26722	1.98e-05	0.000513129
ENSG00000051341	DNA polymerase theta	POLQ	0.0104231	4.26615	1.99e-05	0.000515099
ENSG00000078177	NEDD4 binding protein 2	N4BP2	0.00798652	4.26525	2e-05	0.000516177
ENSG00000092421	semaphorin 6A	SEMA6A	0.00988622	4.26489	2e-05	0.000516515
ENSG00000058799	Yip1 domain family member 1	YIPF1	-0.00729075	-4.26541	2e-05	0.000516177
ENSG00000146386	ABRA C-terminal like	ABRACL	-0.013837	-4.26383	2.01e-05	0.000518487
ENSG00000071575	tribbles pseudokinase 2	TRIB2	-0.00832644	-4.26311	2.02e-05	0.000519664
ENSG00000114698	phospholipid scramblase 4	PLSCR4	0.0105075	4.26043	2.04e-05	0.000525295
ENSG00000044446	phosphorylase kinase regulatory subunit alpha 2	PHKA2	0.00551142	4.25985	2.05e-05	0.000525295
ENSG00000119280	chromosome 1 open reading frame 198	C1orf198	0.00885736	4.25984	2.05e-05	0.000525295
ENSG00000156411	chromosome 14 open reading frame 2	C14orf2	-0.0115389	-4.25906	2.05e-05	0.000526136
ENSG00000250303	uncharacterized LOC283140	RP11-356J5.12	-0.00743492	-4.25961	2.05e-05	0.000525344
ENSG00000164885	cyclin dependent kinase 5	CDK5	-0.0116354	-4.25986	2.05e-05	0.000525295
ENSG00000229816	DEAD-box helicase 50 pseudogene 1	DDX50P1	0.0146638	4.25866	2.06e-05	0.000526239
ENSG00000204644	ZFP57 zinc finger protein	ZFP57	0.0164284	4.25859	2.06e-05	0.000526239
ENSG00000250091	dynein axonemal heavy chain 10 opposite strand	DNAH10OS	0.012562	4.25834	2.06e-05	0.000526241
ENSG00000215493		XXbac-B562F10.11	0.0147024	4.25816	2.06e-05	0.000526241
ENSG00000264630	PRKCA antisense RNA 1	PRKCA-AS1	0.0143614	4.25737	2.07e-05	0.000527112
ENSG00000120903	cholinergic receptor nicotinic alpha 2 subunit	CHRNA2	-0.0111567	-4.25683	2.07e-05	0.000527874
ENSG00000144635	dynein cytoplasmic 1 light intermediate chain 1	DYNC1LI1	-0.00771547	-4.25749	2.07e-05	0.000527112
ENSG00000104723	tumor suppressor candidate 3	TUSC3	-0.00977306	-4.25621	2.08e-05	0.000528852
ENSG00000235641	long intergenic non-protein coding RNA 484	LINC00484	0.0200859	4.25548	2.09e-05	0.000530075
ENSG00000017260	ATPase secretory pathway Ca2+ transporting 1	ATP2C1	-0.00584819	-4.25465	2.09e-05	0.000531543
ENSG00000115297	T-cell leukemia homeobox 2	TLX2	0.0188832	4.25282	2.11e-05	0.000534898
ENSG00000177508	iroquois homeobox 3	IRX3	0.0411945	4.24944	2.14e-05	0.000541991
ENSG00000108106	ubiquitin conjugating enzyme E2 S	UBE2S	-0.0110026	-4.24954	2.14e-05	0.000541991
ENSG00000056972	TRAF3 interacting protein 2	TRAF3IP2	0.0115745	4.24913	2.15e-05	0.000542237
ENSG00000215712	transmembrane protein 242	TMEM242	-0.00928008	-4.24821	2.15e-05	0.000543963
ENSG00000188687	solute carrier family 4 member 5	SLC4A5	0.0129033	4.24681	2.17e-05	0.000546855
ENSG00000134014	elongator acetyltransferase complex subunit 3	ELP3	-0.00697388	-4.24517	2.18e-05	0.000550345
ENSG00000186204	cytochrome P450 family 4 subfamily F member 12	CYP4F12	0.0258592	4.24432	2.19e-05	0.000551541
ENSG00000111863	androgen dependent TFPI regulating protein	ADTRP	-0.0120599	-4.24427	2.19e-05	0.000551541
ENSG00000225663	MAPK regulated corepressor interacting protein 1	MCRIP1	-0.0113062	-4.24357	2.2e-05	0.000552225
ENSG00000139112	GABA type A receptor associated protein like 1	GABARAPL1	-0.012393	-4.24396	2.2e-05	0.000551778
ENSG00000144118	RAS like proto-oncogene B	RALB	-0.00850116	-4.24224	2.21e-05	0.000554987
ENSG00000135750	potassium two pore domain channel subfamily K member 1	KCNK1	-0.0114197	-4.24131	2.22e-05	0.00055676
ENSG00000269825	zinc finger protein 83	CTD-3099C6.9	0.0133807	4.23947	2.24e-05	0.000560313
ENSG00000162062	tubulin epsilon and delta complex 2	C16orf59	-0.00900784	-4.23992	2.24e-05	0.000559704
ENSG00000066405	claudin 18	CLDN18	0.0171155	4.23804	2.25e-05	0.000562839
ENSG00000240204	small lysine rich protein 1	SMKR1	-0.0122614	-4.23879	2.25e-05	0.000561475
ENSG00000177337	DLGAP1 antisense RNA 1	DLGAP1-AS1	0.0127084	4.23703	2.26e-05	0.000564636
ENSG00000075539	FRY like transcription coactivator	FRYL	0.00713138	4.23691	2.27e-05	0.000564636
ENSG00000170919	TPT1 antisense RNA 1	TPT1-AS1	0.0100109	4.23595	2.28e-05	0.000566525
ENSG00000162104	adenylate cyclase 9	ADCY9	0.00894186	4.23565	2.28e-05	0.000566765
ENSG00000183760	acid phosphatase 7, tartrate resistant (putative)	ACP7	0.0168978	4.23503	2.29e-05	0.000567473
ENSG00000108010	glutaredoxin 3	GLRX3	-0.0074461	-4.23474	2.29e-05	0.000567473
ENSG00000247982	long intergenic non-protein coding RNA 926	LINC00926	0.0162645	4.23371	2.3e-05	0.000569562
ENSG00000139180	NADH:ubiquinone oxidoreductase subunit A9	NDUFA9	-0.00736597	-4.23313	2.3e-05	0.000569652
ENSG00000104872	PIH1 domain containing 1	PIH1D1	-0.00981289	-4.23326	2.3e-05	0.000569652
ENSG00000227392	HPN antisense RNA 1	HPN-AS1	0.0168358	4.23305	2.31e-05	0.000569652
ENSG00000260588		RP11-930P14.2	0.0188131	4.23281	2.31e-05	0.000569752
ENSG00000170275	cartilage associated protein	CRTAP	0.00626502	4.23198	2.32e-05	0.000571316
ENSG00000077348	exosome component 5	EXOSC5	-0.0107947	-4.23117	2.32e-05	0.000572342
ENSG00000187815	ZFP69 zinc finger protein	ZFP69	-0.00689852	-4.2312	2.32e-05	0.000572342
ENSG00000119283	tripartite motif containing 67	TRIM67	-0.00811868	-4.22877	2.35e-05	0.000577946
ENSG00000157423	HYDIN, axonemal central pair apparatus protein	HYDIN	0.0104268	4.22607	2.38e-05	0.000584394
ENSG00000130725	ubiquitin conjugating enzyme E2 M	UBE2M	-0.00866625	-4.2256	2.38e-05	0.000585069
ENSG00000256162	small leucine rich protein 1	SMLR1	0.0146715	4.2245	2.39e-05	0.000586625
ENSG00000112695	cytochrome c oxidase subunit 7A2	COX7A2	-0.0131136	-4.22462	2.39e-05	0.000586625
ENSG00000152214	Ras like without CAAX 2	RIT2	-0.0132628	-4.22363	2.4e-05	0.00058753
ENSG00000100600	legumain	LGMN	-0.00763349	-4.22418	2.4e-05	0.000586625
ENSG00000166501	protein kinase C beta	PRKCB	-0.00990169	-4.22437	2.4e-05	0.000586625
ENSG00000228649		AC005682.5	0.0241977	4.22318	2.41e-05	0.000587578
ENSG00000188095	mesoderm posterior bHLH transcription factor 2	MESP2	-0.0143105	-4.22299	2.41e-05	0.000587578
ENSG00000135447	protein phosphatase 1 regulatory inhibitor subunit 1A	PPP1R1A	-0.00775008	-4.22312	2.41e-05	0.000587578
ENSG00000123095	basic helix-loop-helix family member e41	BHLHE41	0.00759087	4.22093	2.43e-05	0.000592439
ENSG00000174939	aspartate beta-hydroxylase domain containing 1	ASPHD1	-0.0105888	-4.2189	2.45e-05	0.000594606
ENSG00000114450	G protein subunit beta 4	GNB4	-0.0069435	-4.21896	2.45e-05	0.000594606
ENSG00000196704	archaelysin family metallopeptidase 2	AMZ2	-0.00561985	-4.21908	2.45e-05	0.000594606
ENSG00000157954	WD repeat domain, phosphoinositide interacting 2	WIPI2	-0.00544608	-4.21916	2.45e-05	0.000594606
ENSG00000162687	potassium sodium-activated channel subfamily T member 2	KCNT2	-0.00777554	-4.21959	2.45e-05	0.000594606
ENSG00000069535	monoamine oxidase B	MAOB	0.00795153	4.21889	2.46e-05	0.000594606
ENSG00000242261		RP11-62J1.3	0.0122057	4.21815	2.46e-05	0.000595712
ENSG00000170745	potassium voltage-gated channel modifier subfamily S member 3	KCNS3	-0.0107534	-4.21806	2.46e-05	0.000595712
ENSG00000144550	copine family member 9	CPNE9	-0.0101662	-4.21594	2.49e-05	0.000600807
ENSG00000120705	eukaryotic translation termination factor 1	ETF1	-0.00641579	-4.21284	2.52e-05	0.000608026
ENSG00000169087	HSPB1 associated protein 1	HSPBAP1	0.00492818	4.21194	2.53e-05	0.000609887
ENSG00000167515	trafficking protein particle complex 2 like	TRAPPC2L	-0.00794563	-4.21162	2.54e-05	0.000610204
ENSG00000242593		RP5-921G16.1	0.012316	4.21074	2.55e-05	0.000612048
ENSG00000204706	MAMDC2 antisense RNA 1	MAMDC2-AS1	0.0106123	4.21054	2.55e-05	0.000612053
ENSG00000233006	MIR3936 host gene	AC034220.3	0.00820857	4.21031	2.55e-05	0.00061211
ENSG00000265261		RP11-162A12.3	0.0153813	4.20978	2.56e-05	0.00061254
ENSG00000146263	MMS22 like, DNA repair protein	MMS22L	0.00761948	4.20924	2.56e-05	0.000612838
ENSG00000118432	cannabinoid receptor 1	CNR1	-0.00987934	-4.20955	2.56e-05	0.00061254
ENSG00000184160	adrenoceptor alpha 2C	ADRA2C	-0.0115458	-4.20962	2.56e-05	0.00061254
ENSG00000187186	uncharacterized LOC730098	RP11-195F19.5	-0.0137108	-4.20749	2.58e-05	0.000616505
ENSG00000147676	mal, T-cell differentiation protein 2 (gene/pseudogene)	MAL2	-0.0114569	-4.20795	2.58e-05	0.000615784
ENSG00000143110	chromosome 1 open reading frame 162	C1orf162	0.0143313	4.20456	2.62e-05	0.000623985
ENSG00000133805	adenosine monophosphate deaminase 3	AMPD3	0.00884872	4.20247	2.64e-05	0.000629228
ENSG00000014914	myotubularin related protein 11	MTMR11	0.0089356	4.20194	2.65e-05	0.000630123
ENSG00000151692	ring finger protein 144A	RNF144A	0.00601033	4.20165	2.65e-05	0.000630372
ENSG00000164099	protease, serine 12	PRSS12	-0.0076671	-4.19999	2.67e-05	0.000634469
ENSG00000251348	heat shock protein family D (Hsp60) member 1 pseudogene 11	HSPD1P11	0.0118039	4.19805	2.69e-05	0.00063849
ENSG00000129654	forkhead box J1	FOXJ1	0.023384	4.19796	2.69e-05	0.00063849
ENSG00000237440	zinc finger protein 737	ZNF737	-0.00700946	-4.19813	2.69e-05	0.00063849
ENSG00000242687	uncharacterized LOC101927550	AC004893.11	0.0111042	4.19747	2.7e-05	0.0006393
ENSG00000090266	NADH:ubiquinone oxidoreductase subunit B2	NDUFB2	-0.00990256	-4.19706	2.7e-05	0.000639872
ENSG00000234290		AC116366.6	0.0136027	4.1964	2.71e-05	0.000640631
ENSG00000150787	6-pyruvoyltetrahydropterin synthase	PTS	-0.0109939	-4.19687	2.71e-05	0.000639872
ENSG00000178585	catenin beta interacting protein 1	CTNNBIP1	-0.00576799	-4.19549	2.72e-05	0.000642072
ENSG00000101938	chordin like 1	CHRDL1	-0.00754536	-4.19594	2.72e-05	0.000641369
ENSG00000135900	mitochondrial ribosomal protein L44	MRPL44	-0.007253	-4.19485	2.73e-05	0.000643315
ENSG00000158352	shroom family member 4	SHROOM4	0.0123858	4.19364	2.75e-05	0.000646213
ENSG00000163879	dynein axonemal light intermediate chain 1	DNALI1	0.00861122	4.19303	2.75e-05	0.000646625
ENSG00000103852	tetratricopeptide repeat domain 23	TTC23	0.00611575	4.19302	2.75e-05	0.000646625
ENSG00000164818	dynein axonemal assembly factor 5	DNAAF5	0.00864694	4.1929	2.75e-05	0.000646625
ENSG00000007174	dynein axonemal heavy chain 9	DNAH9	0.00585109	4.19219	2.76e-05	0.000646766
ENSG00000115598	interleukin 1 receptor like 2	IL1RL2	-0.0103988	-4.19208	2.76e-05	0.000646766
ENSG00000142920	antizyme inhibitor 2	AZIN2	-0.00681515	-4.19249	2.76e-05	0.000646766
ENSG00000185950	insulin receptor substrate 2	IRS2	0.00735744	4.19186	2.77e-05	0.000646766
ENSG00000166582	centromere protein V	CENPV	-0.00775808	-4.19187	2.77e-05	0.000646766
ENSG00000091436	mitogen-activated protein kinase kinase kinase 20	AC013461.1	0.00744252	4.18953	2.8e-05	0.000652548
ENSG00000168016	tetratricopeptide repeat and ankyrin repeat containing 1	TRANK1	0.00911448	4.18944	2.8e-05	0.000652548
ENSG00000249915	programmed cell death 6	PDCD6	-0.00678132	-4.18877	2.8e-05	0.000653922
ENSG00000109670	F-box and WD repeat domain containing 7	FBXW7	-0.00982544	-4.18794	2.81e-05	0.000654606
ENSG00000171169	nuclear apoptosis inducing factor 1	NAIF1	-0.00971659	-4.18825	2.81e-05	0.000654281
ENSG00000125744	reticulon 2	RTN2	-0.00805513	-4.18834	2.81e-05	0.000654281
ENSG00000161265	U2 small nuclear RNA auxiliary factor 1 like 4	U2AF1L4	-0.00850405	-4.18659	2.83e-05	0.000657942
ENSG00000092871	ring finger and FYVE like domain containing E3 ubiquitin protein ligase	RFFL	0.00750162	4.18526	2.85e-05	0.000659527
ENSG00000186665	chromosome 17 open reading frame 58	C17orf58	-0.00780083	-4.18535	2.85e-05	0.000659527
ENSG00000008382	MPN domain containing	MPND	-0.00907084	-4.18537	2.85e-05	0.000659527
ENSG00000175787	zinc finger protein 169	ZNF169	-0.0063692	-4.1855	2.85e-05	0.000659527
ENSG00000261529		RP13-487P22.1	0.018595	4.1834	2.87e-05	0.000663887
ENSG00000164663	ubiquitin specific peptidase 49	USP49	0.0076235	4.18318	2.87e-05	0.000663887
ENSG00000249684		RP11-423H2.3	-0.0192664	-4.18335	2.87e-05	0.000663887
ENSG00000050767	collagen type XXIII alpha 1 chain	COL23A1	-0.00983833	-4.18219	2.89e-05	0.000665625
ENSG00000161281	cytochrome c oxidase subunit 7A1	COX7A1	-0.0167587	-4.18234	2.89e-05	0.000665625
ENSG00000172586	coiled-coil-helix-coiled-coil-helix domain containing 1	CHCHD1	-0.0112887	-4.18131	2.9e-05	0.000667642
ENSG00000017427	insulin like growth factor 1	IGF1	-0.0123022	-4.18012	2.91e-05	0.000669979
ENSG00000155850	solute carrier family 26 member 2	SLC26A2	0.0111344	4.17891	2.93e-05	0.000672548
ENSG00000152578	glutamate ionotropic receptor AMPA type subunit 4	GRIA4	-0.00886176	-4.17887	2.93e-05	0.000672548
ENSG00000167671	UBX domain protein 6	UBXN6	-0.00781319	-4.17634	2.96e-05	0.000678901
ENSG00000109436	TBC1 domain family member 9	TBC1D9	-0.009339	-4.17676	2.96e-05	0.000678223
ENSG00000214013	glucosidase alpha, neutral C	GANC	0.00667239	4.17539	2.97e-05	0.000681154
ENSG00000136883	kinesin family member 12	KIF12	-0.0136884	-4.17474	2.98e-05	0.000682528
ENSG00000227963	RBM15 antisense RNA 1	RP5-1074L1.1	0.0213954	4.17409	2.99e-05	0.00068347
ENSG00000235286		AP000925.2	0.0152419	4.1738	3e-05	0.00068347
ENSG00000132570	pterin-4 alpha-carbinolamine dehydratase 2	PCBD2	0.00641793	4.1737	3e-05	0.00068347
ENSG00000267475		CTD-2538C1.2	-0.0136982	-4.17365	3e-05	0.00068347
ENSG00000155659	V-set and immunoglobulin domain containing 4	VSIG4	0.0239006	4.17255	3.01e-05	0.000685652
ENSG00000104112	secretogranin III	SCG3	-0.00660137	-4.17254	3.01e-05	0.000685652
ENSG00000167483	family with sequence similarity 129 member C	FAM129C	0.0140883	4.17199	3.02e-05	0.000686715
ENSG00000245149	RNF139 antisense RNA 1 (head to head)	RNF139-AS1	0.00968896	4.1717	3.02e-05	0.000686763
ENSG00000141579	zinc finger protein 750	ZNF750	0.0159969	4.17159	3.02e-05	0.000686763
ENSG00000261451		RP11-981G7.1	0.0138567	4.16853	3.07e-05	0.000695239
ENSG00000070366	SMG6, nonsense mediated mRNA decay factor	SMG6	0.00636413	4.16841	3.07e-05	0.000695239
ENSG00000137210	transmembrane protein 14B	TMEM14B	-0.00980681	-4.16769	3.08e-05	0.000696848
ENSG00000165501	leucine rich repeat protein 1	LRR1	0.00913033	4.16607	3.1e-05	0.000701219
ENSG00000182318	zinc finger and SCAN domain containing 22	ZSCAN22	0.00865851	4.16549	3.11e-05	0.000701786
ENSG00000185305	ADP ribosylation factor like GTPase 15	ARL15	-0.00975385	-4.16531	3.11e-05	0.000701786
ENSG00000119185	integrin subunit beta 1 binding protein 1	ITGB1BP1	-0.00683082	-4.16544	3.11e-05	0.000701786
ENSG00000029364	solute carrier family 39 member 9	SLC39A9	-0.00541994	-4.16352	3.13e-05	0.000706721
ENSG00000176142	transmembrane protein 39A	TMEM39A	0.00747735	4.16288	3.14e-05	0.000706731
ENSG00000170899	glutathione S-transferase alpha 4	GSTA4	-0.00933412	-4.16276	3.14e-05	0.000706731
ENSG00000235513	uncharacterized LOC100506544	RP4-756G23.5	0.0111867	4.16244	3.15e-05	0.000706731
ENSG00000196569	laminin subunit alpha 2	LAMA2	0.00671133	4.16237	3.15e-05	0.000706731
ENSG00000114446	intraflagellar transport 57	IFT57	-0.00767354	-4.16237	3.15e-05	0.000706731
ENSG00000145494	NADH:ubiquinone oxidoreductase subunit S6	NDUFS6	-0.0136306	-4.16239	3.15e-05	0.000706731
ENSG00000151617	endothelin receptor type A	EDNRA	-0.00876938	-4.16162	3.16e-05	0.000707862
ENSG00000169271	heat shock protein family B (small) member 3	HSPB3	-0.0153802	-4.16189	3.16e-05	0.000707617
ENSG00000139998	RAB15, member RAS oncogene family	RAB15	-0.00732857	-4.16041	3.18e-05	0.000711053
ENSG00000239263	RNA binding motif protein 43 pseudogene 1	RBM43P1	0.028679	4.1593	3.19e-05	0.000713145
ENSG00000236474	glucosaminyl (N-acetyl) transferase 1, core 2 pseudogene 1	GCNT1P1	0.0167275	4.15916	3.19e-05	0.000713145
ENSG00000162639	HEN methyltransferase 1	HENMT1	-0.0114627	-4.15921	3.19e-05	0.000713145
ENSG00000254629		RP11-160H12.3	0.0146992	4.1572	3.22e-05	0.000718101
ENSG00000180440	serine rich and transmembrane domain containing 1	SERTM1	-0.0135422	-4.15724	3.22e-05	0.000718101
ENSG00000154654	neural cell adhesion molecule 2	NCAM2	-0.0082581	-4.15531	3.25e-05	0.000723469
ENSG00000252757	RNA, 7SK small nuclear pseudogene 96	RN7SKP96	0.0203397	4.15402	3.27e-05	0.000726966
ENSG00000265713		RP11-82O19.2	0.0179216	4.15324	3.28e-05	0.00072884
ENSG00000176208	ATPase family, AAA domain containing 5	ATAD5	0.00868305	4.15156	3.3e-05	0.000733006
ENSG00000204308	ring finger protein 5	RNF5	-0.00815399	-4.1516	3.3e-05	0.000733006
ENSG00000219302		RP11-174C7.3	0.0512978	4.15069	3.31e-05	0.00073517
ENSG00000247624	CPEB2 antisense RNA 1 (head to head)	CPEB2-AS1	0.0156794	4.15041	3.32e-05	0.00073549
ENSG00000140525	Fanconi anemia complementation group I	FANCI	0.00622164	4.15009	3.32e-05	0.000735889
ENSG00000075826	SEC31 homolog B, COPII coat complex component	SEC31B	0.0106031	4.14934	3.33e-05	0.00073715
ENSG00000147437	gonadotropin releasing hormone 1	GNRH1	0.0132265	4.14879	3.34e-05	0.00073715
ENSG00000213585	voltage dependent anion channel 1	VDAC1	-0.0100215	-4.14893	3.34e-05	0.00073715
ENSG00000154222	coiled-coil and C2 domain containing 1B	CC2D1B	0.00486832	4.14805	3.35e-05	0.00073715
ENSG00000100983	glutathione synthetase	GSS	-0.00798383	-4.14824	3.35e-05	0.00073715
ENSG00000180875	gremlin 2, DAN family BMP antagonist	GREM2	-0.0107671	-4.14852	3.35e-05	0.00073715
ENSG00000140832	MARVEL domain containing 3	MARVELD3	0.0167255	4.14774	3.36e-05	0.00073715
ENSG00000152779	solute carrier family 16 member 12	SLC16A12	0.0244808	4.14774	3.36e-05	0.00073715
ENSG00000156030	ELM2 and Myb/SANT domain containing 1	ELMSAN1	0.00986452	4.14771	3.36e-05	0.00073715
ENSG00000243701	DPPA2 upstream binding RNA	DUBR	0.00642003	4.14759	3.36e-05	0.00073715
ENSG00000188064	Wnt family member 7B	WNT7B	-0.0171355	-4.14726	3.36e-05	0.00073715
ENSG00000244038	dolichyl-diphosphooligosaccharide--protein glycosyltransferase non-catalytic subunit	DDOST	-0.0083017	-4.14727	3.36e-05	0.00073715
ENSG00000068366	acyl-CoA synthetase long chain family member 4	ACSL4	-0.00976722	-4.14746	3.36e-05	0.00073715
ENSG00000047230	CTP synthase 2	CTPS2	0.00483809	4.14525	3.39e-05	0.000742479
ENSG00000204131	NHS like 2	NHSL2	0.0122464	4.14524	3.39e-05	0.000742479
ENSG00000136280	CCM2 scaffolding protein	CCM2	-0.00734871	-4.14431	3.41e-05	0.000744259
ENSG00000166922	secretogranin V	SCG5	-0.0113055	-4.14442	3.41e-05	0.000744259
ENSG00000169567	histidine triad nucleotide binding protein 1	HINT1	-0.0126498	-4.14188	3.44e-05	0.000750995
ENSG00000143740	synaptosome associated protein 47	SNAP47	-0.00692846	-4.14231	3.44e-05	0.000750177
ENSG00000083454	purinergic receptor P2X 5	P2RX5	-0.00962498	-4.14157	3.45e-05	0.000751395
ENSG00000106344	RNA binding motif protein 28	RBM28	0.0060053	4.14041	3.47e-05	0.000753377
ENSG00000166171	deleted in primary ciliary dyskinesia homolog (mouse)	DPCD	-0.0108076	-4.14047	3.47e-05	0.000753377
ENSG00000070501	DNA polymerase beta	POLB	-0.00770937	-4.1405	3.47e-05	0.000753377
ENSG00000117877	CD3e molecule associated protein	CD3EAP	-0.00741574	-4.13987	3.48e-05	0.000754545
ENSG00000181610	mitochondrial ribosomal protein S23	MRPS23	-0.0105824	-4.13875	3.49e-05	0.000757615
ENSG00000113161	3-hydroxy-3-methylglutaryl-CoA reductase	HMGCR	-0.00951526	-4.13818	3.5e-05	0.000758889
ENSG00000234327	uncharacterized LOC101928000	AC012146.7	-0.0108958	-4.13744	3.51e-05	0.000760705
ENSG00000154639	CXADR, Ig-like cell adhesion molecule	CXADR	-0.00765378	-4.13679	3.52e-05	0.000762278
ENSG00000134548	spexin hormone	SPX	0.0124625	4.13314	3.58e-05	0.000772606
ENSG00000054116	trafficking protein particle complex 3	TRAPPC3	-0.00894412	-4.13239	3.59e-05	0.000773895
ENSG00000103154	N-terminal EF-hand calcium binding protein 2	NECAB2	-0.00970756	-4.13254	3.59e-05	0.000773895
ENSG00000143442	pogo transposable element derived with ZNF domain	POGZ	0.00959862	4.13189	3.6e-05	0.00077496
ENSG00000133665	DPY30 domain containing 2	DYDC2	-0.0167057	-4.13145	3.6e-05	0.00077496
ENSG00000233821	ENOX1 antisense RNA 1	ENOX1-AS1	0.0131492	4.13101	3.61e-05	0.00077496
ENSG00000133226	serine and arginine repetitive matrix 1	SRRM1	0.00787151	4.13095	3.61e-05	0.00077496
ENSG00000254806	SYS1-DBNDD2 readthrough (NMD candidate)	SYS1-DBNDD2	-0.0126816	-4.13092	3.61e-05	0.00077496
ENSG00000006468	ETS variant 1	ETV1	-0.00918822	-4.13117	3.61e-05	0.00077496
ENSG00000106688	solute carrier family 1 member 1	SLC1A1	-0.00750387	-4.1306	3.62e-05	0.00077496
ENSG00000181894	zinc finger protein 329	ZNF329	-0.00717216	-4.13069	3.62e-05	0.00077496
ENSG00000198417	metallothionein 1F	MT1F	0.0177974	4.12907	3.64e-05	0.000779503
ENSG00000163382	NAD(P)HX epimerase	NAXE	-0.00831658	-4.12852	3.65e-05	0.000780747
ENSG00000062096	arylsulfatase F	ARSF	-0.0139048	-4.12788	3.66e-05	0.000782322
ENSG00000264315	heterogeneous nuclear ribonucleoprotein A1 pseudogene 11	HNRNPA1P11	0.0172969	4.12645	3.68e-05	0.000786441
ENSG00000262943	arachidonate 12-lipoxygenase pseudogene 2	ALOX12P2	0.0105156	4.12618	3.69e-05	0.000786441
ENSG00000257680		RP11-367O10.1	0.0160012	4.1261	3.69e-05	0.000786441
ENSG00000153002	carboxypeptidase B1	CPB1	0.0279668	4.12594	3.69e-05	0.000786441
ENSG00000223878		AC005517.3	0.0184556	4.1252	3.7e-05	0.000787707
ENSG00000171951	secretogranin II	SCG2	-0.0138731	-4.12553	3.7e-05	0.000787217
ENSG00000185627	proteasome 26S subunit, non-ATPase 13	PSMD13	-0.00691416	-4.12349	3.73e-05	0.000792325
ENSG00000132824	serine incorporator 3	SERINC3	-0.00672643	-4.1237	3.73e-05	0.000792232
ENSG00000246922	ubiquitin associated protein 1 like	UBAP1L	0.0119261	4.12277	3.74e-05	0.000793232
ENSG00000251455	uncharacterized LOC107986197	RP11-164P12.3	0.0180875	4.1227	3.74e-05	0.000793232
ENSG00000162757	chromosome 1 open reading frame 74	C1orf74	-0.00868368	-4.12269	3.74e-05	0.000793232
ENSG00000010438	protease, serine 3	PRSS3	-0.0138541	-4.12077	3.78e-05	0.000799239
ENSG00000159147	downstream neighbor of SON	DONSON	0.00608954	4.11992	3.79e-05	0.000800926
ENSG00000178163	zinc finger protein 518B	ZNF518B	-0.00541717	-4.11912	3.8e-05	0.000803083
ENSG00000143786	cornichon family AMPA receptor auxiliary protein 3	CNIH3	-0.00930917	-4.11859	3.81e-05	0.000804276
ENSG00000134243	sortilin 1	SORT1	0.00568651	4.11818	3.82e-05	0.000805079
ENSG00000172336	POP7 homolog, ribonuclease P/MRP subunit	POP7	-0.0106906	-4.11782	3.82e-05	0.000805714
ENSG00000127884	enoyl-CoA hydratase, short chain 1	ECHS1	-0.00812735	-4.11743	3.83e-05	0.00080643
ENSG00000065526	spen family transcriptional repressor	SPEN	0.0096508	4.11582	3.86e-05	0.000810358
ENSG00000169239	carbonic anhydrase 5B	CA5B	0.00684807	4.11576	3.86e-05	0.000810358
ENSG00000166503	HDGF like 3	RP11-382A20.3	-0.00894873	-4.11559	3.86e-05	0.000810358
ENSG00000156475	protein phosphatase 2 regulatory subunit Bbeta	PPP2R2B	-0.00636231	-4.11433	3.88e-05	0.000812896
ENSG00000114686	mitochondrial ribosomal protein L3	MRPL3	-0.0085593	-4.11477	3.88e-05	0.000811977
ENSG00000198673	family with sequence similarity 19 member A2, C-C motif chemokine like	FAM19A2	-0.0122538	-4.11479	3.88e-05	0.000811977
ENSG00000230453	ankyrin repeat domain 18B	ANKRD18B	0.0122518	4.11187	3.92e-05	0.000820669
ENSG00000250508	uncharacterized LOC105369364	RP11-757G1.6	0.014478	4.11167	3.93e-05	0.000820669
ENSG00000149090	peptidase domain containing associated with muscle regeneration 1	PAMR1	-0.00892423	-4.1116	3.93e-05	0.000820669
ENSG00000246889		AP000487.5	0.00969182	4.10937	3.97e-05	0.000827727
ENSG00000129355	cyclin dependent kinase inhibitor 2D	CDKN2D	-0.0128684	-4.10926	3.97e-05	0.000827727
ENSG00000137221	tight junction associated protein 1	TJAP1	0.0101024	4.10849	3.98e-05	0.000829853
ENSG00000230001		RP11-70J12.1	0.0216	4.10787	3.99e-05	0.000830868
ENSG00000129235	thioredoxin domain containing 17	TXNDC17	-0.00685032	-4.10785	3.99e-05	0.000830868
ENSG00000196187	transmembrane protein 63A	TMEM63A	0.0134027	4.10682	4.01e-05	0.000833276
ENSG00000082458	discs large MAGUK scaffold protein 3	DLG3	-0.0096427	-4.10718	4.01e-05	0.000832614
ENSG00000162231	nuclear RNA export factor 1	NXF1	0.00994708	4.1055	4.03e-05	0.000837416
ENSG00000204869	IGF like family member 4	IGFL4	0.00860067	4.10485	4.05e-05	0.000839127
ENSG00000130707	argininosuccinate synthase 1	ASS1	-0.00844371	-4.10456	4.05e-05	0.000839517
ENSG00000172830	slingshot protein phosphatase 3	SSH3	0.008844	4.10378	4.06e-05	0.000841067
ENSG00000167964	RAB26, member RAS oncogene family	RAB26	-0.00953512	-4.1039	4.06e-05	0.000841067
ENSG00000177150	family with sequence similarity 210 member A	FAM210A	-0.00529264	-4.10099	4.11e-05	0.000850607
ENSG00000228315	glucuronidase, beta pseudogene 11	GUSBP11	0.00829188	4.0999	4.13e-05	0.000853968
ENSG00000247317	LY6E divergent transcript	RP11-273G15.2	-0.00711144	-4.09901	4.15e-05	0.000855947
ENSG00000196510	anaphase promoting complex subunit 7	ANAPC7	-0.00577866	-4.09915	4.15e-05	0.000855947
ENSG00000255403		AP000641.1	0.0134272	4.09795	4.17e-05	0.000859195
ENSG00000229294		RP5-1044H5.1	0.0196015	4.09697	4.19e-05	0.00086218
ENSG00000198208	ribosomal protein S6 kinase like 1	RPS6KL1	-0.00646252	-4.09658	4.19e-05	0.000862316
ENSG00000240771	Rho guanine nucleotide exchange factor 25	ARHGEF25	-0.00738015	-4.0964	4.2e-05	0.000862316
ENSG00000145824	C-X-C motif chemokine ligand 14	CXCL14	-0.00945575	-4.09644	4.2e-05	0.000862316
ENSG00000185722	ankyrin repeat and FYVE domain containing 1	ANKFY1	0.00642525	4.09579	4.21e-05	0.000863929
ENSG00000187672	ELKS/RAB6-interacting/CAST family member 2	ERC2	-0.00586873	-4.09432	4.23e-05	0.000868787
ENSG00000223839	family with sequence similarity 95 member B1	FAM95B1	0.0168506	4.09275	4.26e-05	0.000872829
ENSG00000234913		XXbac-B476C20.13	0.0182291	4.09271	4.26e-05	0.000872829
ENSG00000124688	MAD2L1 binding protein	MAD2L1BP	-0.00960373	-4.09304	4.26e-05	0.000872829
ENSG00000182197	exostosin glycosyltransferase 1	EXT1	-0.00409501	-4.09192	4.28e-05	0.000875143
ENSG00000182534	matrix remodeling associated 7	MXRA7	-0.00537837	-4.09051	4.3e-05	0.000879824
ENSG00000135116	harakiri, BCL2 interacting protein	HRK	-0.00865143	-4.08674	4.37e-05	0.000892887
ENSG00000124222	syntaxin 16	STX16	0.00838046	4.08545	4.4e-05	0.000897182
ENSG00000262503		RP11-530N7.2	0.0163242	4.08513	4.41e-05	0.000897732
ENSG00000101247	NADH:ubiquinone oxidoreductase complex assembly factor 5	NDUFAF5	-0.00829897	-4.08474	4.41e-05	0.000897993
ENSG00000095637	sorbin and SH3 domain containing 1	SORBS1	0.0068096	4.08443	4.42e-05	0.000897993
ENSG00000233056	endogenous retrovirus group 48 member 1	ERVH48-1	0.0156733	4.08436	4.42e-05	0.000897993
ENSG00000126581	beclin 1	BECN1	-0.00757835	-4.08436	4.42e-05	0.000897993
ENSG00000163814	CUB domain containing protein 1	CDCP1	0.0145264	4.0835	4.44e-05	0.000900485
ENSG00000170836	protein phosphatase, Mg2+/Mn2+ dependent 1D	PPM1D	0.00530641	4.08326	4.44e-05	0.000900485
ENSG00000197223	C1D nuclear receptor corepressor	C1D	-0.0103954	-4.08319	4.44e-05	0.000900485
ENSG00000103067	epithelial splicing regulatory protein 2	ESRP2	0.0171731	4.08236	4.46e-05	0.000902448
ENSG00000119688	ATP binding cassette subfamily D member 4	ABCD4	0.00761072	4.08233	4.46e-05	0.000902448
ENSG00000233332		RP4-799P18.2	0.0170871	4.08187	4.47e-05	0.000903173
ENSG00000197584	potassium calcium-activated channel subfamily M regulatory beta subunit 2	KCNMB2	-0.00984671	-4.08179	4.47e-05	0.000903173
ENSG00000062582	mitochondrial ribosomal protein S24	MRPS24	-0.0104429	-4.08077	4.49e-05	0.000905813
ENSG00000226137	BAIAP2 antisense RNA 1 (head to head)	BAIAP2-AS1	-0.0087504	-4.08094	4.49e-05	0.000905795
ENSG00000267731		RP11-147L13.8	0.0140874	4.07811	4.54e-05	0.000915519
ENSG00000186812	zinc finger protein 397	ZNF397	0.00488022	4.07721	4.56e-05	0.000918396
ENSG00000206530	cilia and flagella associated protein 44	CFAP44	0.00649777	4.07655	4.57e-05	0.000918713
ENSG00000188730	von Willebrand factor C domain containing 2	VWC2	-0.0107216	-4.07636	4.57e-05	0.000918713
ENSG00000197816	coiled-coil domain containing 180	CCDC180	0.0119831	4.07626	4.58e-05	0.000918713
ENSG00000144355	distal-less homeobox 1	DLX1	-0.0093747	-4.07632	4.58e-05	0.000918713
ENSG00000153310	family with sequence similarity 49 member B	FAM49B	-0.00827405	-4.07632	4.58e-05	0.000918713
ENSG00000140090	solute carrier family 24 member 4	SLC24A4	0.00776083	4.07509	4.6e-05	0.000921969
ENSG00000156990	RNA pseudouridylate synthase domain containing 3	RPUSD3	-0.00624187	-4.07514	4.6e-05	0.000921969
ENSG00000169758	transmembrane protein 266	TMEM266	-0.00714787	-4.07384	4.62e-05	0.000926211
ENSG00000026559	potassium voltage-gated channel modifier subfamily G member 1	KCNG1	-0.0139233	-4.07289	4.64e-05	0.000929317
ENSG00000257542	olfactory receptor family 7 subfamily E member 47 pseudogene	OR7E47P	-0.0275908	-4.07189	4.66e-05	0.000932622
ENSG00000178741	cytochrome c oxidase subunit 5A	COX5A	-0.00827784	-4.07117	4.68e-05	0.000934833
ENSG00000138107	ARP1 actin related protein 1 homolog A	ACTR1A	-0.00544209	-4.07022	4.7e-05	0.000937962
ENSG00000104332	secreted frizzled related protein 1	SFRP1	0.0107491	4.06935	4.71e-05	0.00094077
ENSG00000110148	cholecystokinin B receptor	CCKBR	-0.0105307	-4.06865	4.73e-05	0.000942875
ENSG00000169876	mucin 17, cell surface associated	MUC17	0.0429587	4.06813	4.74e-05	0.000944288
ENSG00000104432	interleukin 7	IL7	0.0142445	4.06753	4.75e-05	0.000946011
ENSG00000160345	chromosome 9 open reading frame 116	C9orf116	-0.00885001	-4.06643	4.77e-05	0.000948846
ENSG00000145247	OCIA domain containing 2	OCIAD2	-0.00992947	-4.06666	4.77e-05	0.000948846
ENSG00000068024	histone deacetylase 4	HDAC4	0.00808491	4.06629	4.78e-05	0.000948846
ENSG00000078795	polycystin 2 like 2, transient receptor potential cation channel	PKD2L2	0.0105687	4.06529	4.8e-05	0.000951618
ENSG00000100764	proteasome 26S subunit, ATPase 1	PSMC1	-0.00796898	-4.06401	4.82e-05	0.000956151
ENSG00000261646		RP11-489G11.3	0.0171722	4.0636	4.83e-05	0.000957149
ENSG00000134809	translocase of inner mitochondrial membrane 10	TIMM10	-0.0111282	-4.06278	4.85e-05	0.000959789
ENSG00000168386	filamin A interacting protein 1 like	FILIP1L	0.00941227	4.06248	4.86e-05	0.000960191
ENSG00000122034	general transcription factor IIIA	GTF3A	-0.00700119	-4.06234	4.86e-05	0.000960191
ENSG00000213711	prohibitin pseudogene 7	PHBP7	0.0211502	4.06156	4.87e-05	0.0009627
ENSG00000175984	DENN domain containing 2C	DENND2C	-0.00801853	-4.06024	4.9e-05	0.00096746
ENSG00000213995	NAD(P)HX dehydratase	NAXD	-0.00558927	-4.05963	4.91e-05	0.000969247
ENSG00000234111	long intergenic non-protein coding RNA 2433	RP11-364P22.1	-0.0141719	-4.05756	4.96e-05	0.000977157
ENSG00000150977	Rab interacting lysosomal protein like 2	RILPL2	-0.00716675	-4.0569	4.97e-05	0.000979215
ENSG00000177963	RIC8 guanine nucleotide exchange factor A	RIC8A	-0.00571813	-4.05608	4.99e-05	0.000981934
ENSG00000136143	succinate-CoA ligase ADP-forming beta subunit	SUCLA2	-0.0111201	-4.05482	5.02e-05	0.000986517
ENSG00000164764	somatomedin B and thrombospondin type 1 domain containing	SBSPON	0.011982	4.05434	5.03e-05	0.00098781
ENSG00000228600	RNA polymerase II subunit C pseudogene 1	POLR2CP1	-0.0186299	-4.05357	5.04e-05	0.000989977
ENSG00000233532	long intergenic non-protein coding RNA 460	LINC00460	-0.0158228	-4.05349	5.05e-05	0.000989977
ENSG00000004779	NADH:ubiquinone oxidoreductase subunit AB1	NDUFAB1	-0.012632	-4.05129	5.09e-05	0.000998613
ENSG00000259891		CTA-204B4.2	0.0118662	4.05094	5.1e-05	0.000999369
